# RiVIERA-MT:

## A Bayesian model to infer risk variants in related traits using summary statistics and functional genomic annotations

Yue Li<sup>1,2,\*</sup> and Manolis Kellis<sup>1,2,\*</sup>

<sup>1</sup>Computer Science and Artificial Intelligence Lab, Massachusetts Institute of Technology, 32 Vassar St, Cambridge, Massachusetts 02139, USA

<sup>2</sup>The Broad Institute of Harvard and MIT, 415 Main Street, Cambridge, Massachusetts 02142, USA

\*Correspondence to [liyue@mit.edu](mailto:liyue@mit.edu) or [manoli@mit.edu](mailto:manoli@mit.edu)

Fine-mapping causal variants is challenging due to linkage disequilibrium and the lack of interpretation of noncoding mutations. Existing fine-mapping methods do not scale well on inferring multiple causal variants per locus and causal variants across multiple related diseases. Moreover, many complex traits are not only genetically related but also potentially share causal mechanisms. We develop a novel integrative Bayesian fine-mapping model named RiVIERA-MT. The key features of RiVIERA-MT include 1) ability to model epigenomic covariance of multiple related traits; 2) efficient posterior inference of causal configuration; 3) efficient full Bayesian inference of enrichment parameters, allowing incorporation of large number of functional annotations; 4) simultaneously modeling the underlying heritability parameters. We conducted a comprehensive simulation studies using 1000 Genome and ENCODE/Roadmap epigenomic data to demonstrate that RiVIERA-MT compares quite favorably with existing methods. In particular, the efficient inference of multiple causal variants per locus led to significantly improved estimation of causal posterior and functional enrichments compared to the state-of-the-art fine-mapping methods. Furthermore, joint modeling multiple traits confers further improvement over the single-trait mode of the same model, which is attributable to the more robust estimation of the enrichment parameters especially when the annotation measurements (i.e., ChIP-seq) themselves are noisy. We applied RiVIERA-MT to separately and jointly model 7 well-powered GWAS traits including body mass index, coronary artery disease, four lipid traits, and type 2 diabetes. To leverage potential tissue-specific epigenomic co-enrichments among these traits, we harness 52 baseline functional annotations and 220 tissue-specific epigenomic annotations from well-characterized cell types compiled from ENCODE/Roadmap consortium. Overall, we observed an improved enrichments for GTEx whole blood and

35 tissue-specific eQTL SNPs based on the prioritized SNPs by RiVIERA-MT compared  
36 to existing methods.

## 37 1 Introduction

38 Genome wide association studies (GWAS) can help gain numerous insights on the genetic  
39 basis of complex diseases, and ultimately contribute to personalized risk prediction and pre-  
40 cision medicine [1–4]. However, fine-mapping the exact causal variants is challenging due to  
41 linkage disequilibrium (LD) and the lack of ability to interpret the function of noncoding  
42 variants, which contribute to about 90% of the current GWAS catalog (40.7% intergenic  
43 and 48.6% intronic; [5]). On the other hand, several lines of evidence have been proposed  
44 to help interpret non-coding genetic signals, in order to gain insights into potential regula-  
45 tory functions. In particular, epigenomic annotations can pinpoint locations of biochemical  
46 activity indicative of cis-regulatory functions [6, 7]. Indeed, comparison with genome-wide  
47 annotations of putative regulatory elements has shown enrichment of GWAS variants in  
48 enhancer-associated histone modifications, regions of open chromatin, and conserved non-  
49 coding elements [3, 6, 8–12], indicating they may play gene-regulatory roles. These enrich-  
50 ments have been used to predict relevant cell types and non-coding annotations for specific  
51 traits [6, 9, 13].

52 Recently, several methods proposed to model the summary statistics of GWAS and thus  
53 circumvent the difficulties of accessing individual-level genotype data [14–18]. Some of these  
54 methods also utilize the wealth of genome-wide annotations primarily provided by ENCODE  
55 consortium to predict causal variants. In particular, Pickrell (2014) developed a statistical  
56 approach called fgwas that models association statistics of a given trait and used regularized  
57 logistic function to simultaneously learn the relevant annotations. To account for LD, fgwas  
58 assumes at most one causal variants per locus by normalizing the posterior probabilities of  
59 SNPs within the same locis. Kichaev et al. (2014) recently developed a multivariate Gaussian  
60 framework called PAINTOR, which allows for more than one causal SNP but at most three  
61 to be located within a single locus by considering all of the combinatorial settings [15].  
62 Chung et al. (2014) developed model called GPA to prioritize individual pleiotropic risk  
63 variants among multiple related traits by essentially numerating for each SNP all possible  
64 configurations across traits with an option of using one or more sets of annotations to improve  
65 the power detecting causal variants [16]. GPA does not consider LD and assumes that SNPs  
66 are independent. Recently, we also developed a model called RiVIERA-beta, which uses  
67 functional annotations to infer causal variants by modeling the GWAS p-values via Beta  
68 density. Although RiVIERA-beta works on well on inferring regulatory variants on immune  
69 traits using ImmunoChip summary statistics data, it is limited to the assumption of one  
70 causal variant per locus (Li and Kellis, bioRxiv 2016).

71 Moreover, many complex traits are genetically related [19, 20] and potentially share causal  
72 mechanisms such as lipid traits and coronary artery disease [21], autoimmune diseases [22, 23]  
73 and psychiatric disorders [24, 25]. Most of these related traits have distinct genome-wide  
74 significant loci but it is plausible that they share the causal effects at the pathway level. Thus,  
75 we hypothesize that exploiting the correlation between traits at the epigenomic annotation  
76 level may prove useful in fine-mapping for shared causal mechanisms that go beyond the level

77 of individual variants. Currently, there is a lack of fine-mapping method that harnesses the  
78 intrinsic comorbidity that manifest as tissue-specific epigenomic correlations among related  
79 traits.

80 In this article, we describe a novel Bayesian framework called RiVIERA-MT (Risk  
81 Variant Interference using Epigenomic Reference Annotations to predict Multiple Trait-causing  
82 co-localized mutations) to fine-map causal variants across multiple related traits by modeling  
83 the distribution of GWAS summary statistics in multivariate normal distribution with the  
84 aid of LD information from 1000 Genome reference panel. Compared to existing methods,  
85 the main novelty of RiVIERA-MT is the ability to perform efficient full Bayesian inference  
86 of multiple causal variants per locus across multiple traits while simultaneously inferring  
87 and leveraging the functional co-enrichment signals among traits using related baseline and  
88 tissue-specific epigenomic annotations. We achieve this via an efficient Markov Chain Monte  
89 Carlo (MCMC) approach by jointly sampling from the posterior distribution causal con-  
90 figurations for each locus and functional effects of each annotation that are shared among  
91 loci for the same trait and potentially correlate between traits. To evaluate our proposed  
92 model rigorously, we conduct a comprehensive simulation studies using 1000 Genome data  
93 and ENCODE/Roadmap epigenomic data.

94 We then apply RiVIERA-MT to jointly fine-map causal variants of 7 related well-powered  
95 GWAS traits, including body mass index (BMI) [26], coronary artery disease (CAD) [27], low  
96 density lipoprotein (LDL), high density lipoprotein (HDL), triglycerides (TG), total chole-  
97 sterol (TC) [28], and type 2 diabetes (T2D) [29]. To leverage potential tissue-specific epige-  
98 nomic co-enrichments among these traits, we harness the largest compendium of epigenomic  
99 annotations to date from ENCODE/Roadmap consortium, including 4 previously implicated  
100 epigenomic marks (H3K4me1, H3K4me3, H3K27ac, H3K9ac) across 100 well characterized  
101 cell types and tissues [7]. This allows us to revisit the GWAS of these 7 complex human traits  
102 by inferring their underlying regulatory variants implicated at the tissue-specific epigenomic  
103 contexts.

## 104 2 Results

### 105 2.1 RiVIERA-MT method overview

106 We describe a novel full Bayesian model to infer causal variants. **Fig. 1** illustrates the fine-  
107 mapping problems in three representative scenarios using simulated data (**Methods**). In the  
108 first scenario, the risk locus harbors one causal variant (red cricle), which drives the genetic  
109 signals of other non-causal variants via linkage disequilibrium (LD) (**Fig. 1a**). Notably, the  
110 lead SNP (dark diamond) with the most significant p-value is not the causal variant. In this  
111 case scenario, the underlying epigenomic activities (middle track) provide a crucial evidence  
112 to the inference of functional variants. Methods that assume single causal variant per locus  
113 may work well here by normalizing the posterior for each SNP within the locus [14, 30].  
114 However, these methods become inadequate when there are more than one causal variant  
115 within the same locus (**Fig. 1b,c**) because they will pull down the true signals of all causal  
116 variants in order to maintain a properly normalized posterior probabilities.

117 Our RiVIERA-MT builds upon some of the existing fine-mapping methods [17, 18, 31, 32]

118 by utilizing multivariate normal theory to infer the posterior distribution of *causal configu-*  
119 *rations* and subsequently marginalizes the posterior to infer posterior inclusion probabilities  
120 (PIP) for each SNP among all sampled configurations [15, 17, 18, 33, 34] (**Methods**). How-  
121 ever, as illustrated in **Fig. 2** and detailed in **Methods**, RiVIERA-MT has several significant  
122 novel features that distinguish it from the existing fine-mapping methods:

- 123 1. Ability to model epigenomic covariance  $\Sigma_w$  of multiple related traits, which do not  
124 necessarily share the same set of risk loci (**Fig. 2a** and **c**);
- 125 2. Efficient posterior inference of causal configurations  $\mathbf{c}_{ld}$  for each locus  $l$  and disease  $d$ ,  
126 automatically determining the number of causal variants in each risk locus (**Fig. 2b**);
- 127 3. Efficient full Bayesian inference of functional parameters of epigenomic weights ( $\mathbf{w}_k$ )  
128 allowing incorporation of a large number of discrete or continuous annotations  $\mathbf{a}_{ldk}$   
129 with lesser concern of overfitting due to the full Bayesian treatments (**Fig. 2c**);
- 130 4. Simultaneously modeling the underlying heritability parameters as per-SNP variance  
131 explained  $\sigma_{a,d}^2$  and leveraging it in the causal inference (**Fig. 2c**);

132 It is worth noting that the multi-trait feature of RiVIERA-MT allows us to fine-map causal  
133 variants simultaneously across a large number of traits because the model complexity grows  
134 only linear to the number of traits. Because we only associate traits via the epigenomic co-  
135 variance, we impose only a weak prior on the underlying relatedness of traits. This contrasts  
136 to the direct inference approach of detecting the individual pleiotropic variants that affect  
137 zero, one or multiple related traits [16], which is exponential to the number of traits modeled  
138 for each SNP in order to consider all of the configurations of the same SNP across traits.  
139 Our model also differs from directly inferring causal variants within pleiotropic loci, which  
140 requires both the underlying causal variants and the genome-wide significant loci to be same  
141 across traits (Kichaev *et al.*, bioRxiv 2016).

## 142 **2.2 Empirical analysis of model convergence**

143 Convergence is crucial for an MCMC approach to accurately approximate the posterior  
144 distributions of causal variants. Although we do not have a theoretical guarantee for the  
145 convergence of our model, we examined the joint posteriors at each MCMC iteration across  
146 1000 samplings using 100 simulated datasets (**Methods**). Indeed, we observed that our  
147 model converged very fast after a few iterations attributable to the sensible MCMC sam-  
148 pling methods (**Supplementary Fig. S2a**). At each MCMC iteration, we performed a fixed  
149 number of stochastic searches of *the entire local neighborhood* of the current causal configura-  
150 tions [18,35]. Thus, the number of searches needed to reach the optimal power is independent  
151 from the size of the locus. We assessed the model performance as a function of an increasing  
152 number of neighborhood searches. Indeed, we observed a steady improvement as we increased  
153 the number of neighborhood searches, and the model reached to the optimal detection power  
154 at 10 rounds of stochastic searches (**Supplementary Fig. S2b**). Accordingly, we fixed the  
155 number of searches to 10 throughout this study.



## 2.3 Improved fine-mapping power over existing methods

To assess the power of the proposed fine-mapping model in identifying causal variants and compare it with existing methods, we implemented a simulation pipeline adapted from [15] (**Methods**). RiVIERA-MT demonstrates a consistently improved power in detecting causal variants (**Fig. 3**). For instance, the top 100 selected variants by RiVIERA-MT contain over 50% of the causal variants over most simulation tests in contrast to lower than 40% of the causal variants detected among the top variants chosen by PAINTOR [15], which is the current state-of-art fine-mapping method that integrates annotations with summary statistics. Furthermore, RiVIERA-MT effectively incorporates functional annotations as it performs much better than the same model without annotations. Notably, the methods that explicitly account for LD namely our RiVIERA-MT model and PAINTOR conferred much higher power compared to fgwas [14] and RiVIERA-beta (Li and Kellis, bioRxiv 2016) which assume single causal variant per locus. Nonetheless, fgwas and RiVIERA-beta perform better than GPA and marginal GWAS  $-\log_{10}$  p-value, which assume that all of the SNPs are independent.

From our simulation, a single locus can harbor more than one causal variant, some of which may exhibit rather weak genetic signals due to relatively low allele frequency. For instance, **Fig. 1b** and **c** illustrate two loci containing 3 and as many as 10 causal variants in the same loci, respectively. In these cases, our RiVIERA-MT model is still able to efficiently infer the correct PIP by marginalizing over a large number of sampled causal configurations with high local posteriors, which automatically accounts for the potentially large number of causal variants within the same locus without predefining the number of causal variants per locus. As a result, the posterior probabilities produced by RiVIERA-MT are well calibrated and exhibit consistently superior performance by identifying additional number of causal variants when selecting more than 10 variants per locus (**Supplementary Fig. S3**). On the other hand, when the number of causal variants to consider go beyond a model's ability to infer, the causal signals are poorly calibrated. This is the main reason RiVIERA-beta and fgwas (which assumes 1 causal variant per locus) and PAINTOR (which is only able to infer by default at maximum 2 causal variants per locus due to exhaustive search) perform worse in prioritizing variants beyond top 10 SNPs per locus compared to methods such as GPA and GWAS  $-\log_{10}$  p-values that do not impose any normalization constraints on the SNPs.

## 2.4 Functional enrichments

In addition to the improved power in causal variant detection when using annotations, we sought to further ascertain the ability of RiVIERA-MT to incorporate relevant annotations. To this end, we performed Bayesian log-likelihood ratio tests (LRT) on each annotation by comparing the likelihoods of the null models without the annotation in question with the likelihoods of the alternative models with the annotation incorporated. The Bayesian credible interval of the LRT statistics was obtained naturally from the MCMC samplings (**Methods**). Indeed, we observed a consistent agreement between the predicted LRT and the underlying fold enrichment of each annotation from the simulated data with the median Pearson correlation above 0.78 (**Fig. 4**). PAINTOR and RiVIERA-MT have rather comparable performance and performed much better than fgwas and GPA. Notably, the accuracy

198 of enrichment tests reflects the accuracy of fine-mapping as all of the four methods jointly  
199 infer both the causal variants and the enrichment parameters. Thus, models that generalize  
200 to inferring multiple causal variants per locus confer more robust estimate of the enrichment  
201 compared to models that do not.

## 202 **2.5 Inferring variance explained by causal SNPs**

203 As a part of the full Bayesian fine-mapping algorithm, RiVIERA-MT is able to infer the  
204 distribution of per-SNP variance via the MCMC sampling scheme, which is related to the  
205 narrow-sense heritability [31, 36] (**Methods**). We assessed the variance estimate by sim-  
206 ulating GWAS datasets with heritability values ranging from 0.05 to 0.95. Overall, we  
207 observed a consistent increase of the estimates as we increased the underlying heritabili-  
208 ties (**Supplementary Fig. S4**). This is remarkable compared to the existing fine-mapping  
209 methods such as CAVIARBF [17] and FINEMAP [18], which treat the per-SNP variance  
210 as a free parameter defined by the users. For a normalized heritability estimation (ranging  
211 between 0 and 1) (which is not the focus of our model), we need to know the standard error  
212 from the linear model and *genome-wide* effect sizes of all of the SNPs (Zhu and Stephens,  
213 bioRxiv 2016) as apposed to the SNPs in the GWAS loci, which have been integrated out in  
214 our model.

## 215 **2.6 Joint inference of multiple traits**

216 An additional novel feature of RiVIERA-MT is the ability to jointly model the summary  
217 statistics of multiple traits, which do not share the same risk loci. To examine whether  
218 the multi-trait mode of the model provides any improved performance in detecting causal  
219 variants, we simulated 100 datasets for 2 to 10 related traits. Despite distinct risk loci,  
220 we correlated the traits based on the functional co-enrichments of the cognate causal vari-  
221 ants over the 100 epigenomic annotations (**Methods**). Thus, model that is able to harness  
222 this underlying correlation by jointly inferring the causal variants and causal annotations  
223 across the related traits should confer better performance than modeling each trait sepa-  
224 rately. Indeed, compared to the single-trait RiVIERA-MT model, we observed a modest but  
225 significant gain of power reflected by the reduced number of SNPs required to identify 90%  
226 of the causal variants (**Fig. 5**). The improvements of multi-trait mode over single-trait are  
227 consistent over different number of traits.

228 As expected, the improvement is completely attributable to the improved empirical prior  
229 inference (**Fig. 5** top panels) because it is the only model component that is connected  
230 to the estimated covariance of the annotation weights (**Fig. 2**). When the genetic signals  
231 are incorporated into the posterior model component, we observed less pronounced but still  
232 notable improved resolution (**Fig. 5** top panels). Additionally, we assessed the robustness of  
233 the models in their abilities to infer causal variants when the annotations themselves are noisy  
234 estimates of the true underlying annotations. This is a realistic scenario since the epigenomic  
235 annotations were based on ChIP-seq experiments, which are often noisy due to imperfect  
236 efficacy of antibodies, sequencing errors, read alignment error, peak calling algorithmic errors,  
237 etc. To this end, we used standardized continuous annotations instead of binary annotations  
238 to fit each model and assessed the number of SNPs required to identify 90% causal variants.

239 As expected, the general performance decreased when using the noisy annotations (**Fig. 2**  
240 right panels). However, the multi-trait model exhibits better robustness compared to the  
241 single-trait model especially when modeling more than 2 traits simultaneously.

## 242 **2.7 Application to body mass index, lipid traits, type 1 diabetes,** 243 **and coronary artery disease**

244 We applied RiVIERA-MT to 7 related traits including body mass index (BMI), 4 lipid traits  
245 (HDL, LDL, TC, TG), type 1 diabetes (T1D), and coronary artery disease (CAD) using  
246 the corresponding publicly available summary statistics imputed to 1000 Genome European  
247 SNPs (**Methods**; **Supplementary Table S1**). We first examined the *genome-wide* func-  
248 tional enrichments over 272 well defined annotations including 52 baseline annotations and  
249 220 cell-type-specific annotations over four transcription-activating histone marks via LD  
250 score regression on the z-scores of the HapMap3 SNPs from each GWAS trait against Eu-  
251 ropean 1000 Genome Phase 1 (version 3) LD reference panel (**Methods**) [37]. Consistent  
252 with the published results [37], we observed meaningful cell-type-specific functional enrich-  
253 ments for the GWAS traits conditioned on the 52 baseline functional categories (**Fig. 2a**):  
254 BMI is significantly enriched for CNS functional categories; the 4 lipid traits are significantly  
255 enriched for liver for one or more histone marks; CAD for heart tissues; T2D for pancreas.  
256 Thus, the causal signals are highly implicated in the functional annotations, suggesting an  
257 integrative fine-mapping method such as RiVIERA-MT to incorporate them to improve  
258 the power of fine-mapping causal variants that potentially disrupt various functional ele-  
259 ments and especially the tissue-specific regulatory elements of the genome. However, we also  
260 observed a pervasive sharing of functional enrichments between traits, which suggest that  
261 jointly modeling these related traits may further improve fine-mapping power over modeling  
262 each trait separately.

263 To fine-map causal variants in independent risk loci for each trait (**Methods**), we applied  
264 RiVIERA-MT in multi-trait and single-trait mode as well as the PAINTOR model [15] on  
265 each GWAS data using the subset of the baseline and cell-specific annotations with enrich-  
266 ment p-values  $< 0.05$  after Benajmini-Hocherg adjustment for multiple testings over the 7  
267 traits and 272 annotations. We first visualized the fine-mapping results of RiVIERA-MT on  
268 single-trait mode with four tracks for each trait including (top-bottom) GWAS p-values,  
269 baseline annotations, cell-specific annotations, and the posterior inclusion probabilities (PIP)  
270 inferred by RiVIERA-MT (**Supplementary Fig. S5**). Consistent with previously reported  
271 results [36–38], the baseline model (second track) suggest that the risk loci are highly en-  
272 riched for enhancer-related regions/marks such as DNA hypersensitive site (DHS), H3K27ac,  
273 and H3K4me1 for all of the 7 traits. More remarkably, we observed a striking distinct tissue-  
274 specific epigenomic landscapes (the third track) between different GWAS traits. In partic-  
275 ular, the BMI loci are highly enriched for CNS related histone marks whereas CAD exhibit  
276 modest enrichment for cardiovascular marks, HDL for liver, and T2D for Adrenal/Pancreas.

277 The inferred PIP prioritizes SNPs by taking into account 3 sources of information: 1)  
278 GWAS signals in terms of z-scores; 2) significant annotations determined by LDSC; 3) linkage  
279 disequilibrium from 1000 Genome European reference panel. While many variants with PIP  
280  $< 0.9$  also exhibit significant GWAS signals ( $p < 5e-8$ ), a substantial number of SNPs that are

281 below the GWAS threshold became prominent after the re-prioritization (**Supplementary**  
282 **Fig. S5**). We then applied RiVIERA-MT to jointly model the data of the 7 GWAS traits.  
283 The resulting PIP from the multi-trait mode generally correlate well with the PIP from  
284 the single-trait mode (**Supplementary Fig. S6**). Because there is no gold-standard for  
285 the causal SNPs of each trait, we compared the inference results from RiVIERA-MT and  
286 PAINTOR in terms of the overlap of the 90% credible set from each method, which are  
287 determined as the SNPs with PIP that contributed to 90% of the total posterior mass  
288 (**Supplementary Fig. 6**). In general, there are substantial overlap between RiVIERA-  
289 MT's and PAINTOR's 90% credible sets, implying an overall consistent agreements among  
290 these methods. Importantly, the PIP for each method increases as a function of the number  
291 of supporting methods (**Fig. 6**).

292 Moreover, as an empirical evaluation for the functional implication of the prioritized  
293 variants, we ranked the SNPs by the corresponding PIPs inferred by each method and  
294 computed the hypergeometric enrichments for the GTEx (version 6) whole blood eQTL SNPs  
295 (WB) or tissue-specific eQTL SNPs as a function of the increasing number of top variants  
296 selected. For the tissue-specific eQTL SNPs, we chose brain and nerve tissues for BMI, artery  
297 and heart tissues for CAD, liver and adipose for the four lipid traits, and pancreas for T2D.  
298 Although the results are not monotonically favorable for a single method, SNPs prioritized by  
299 RiVIERA-MT single or multi-trait models exhibit higher overall enrichments for the eQTL  
300 SNPs compared to PAINTOR and GWAS  $-\log P$  methods in most traits (**Fig. 7a**).

301 Since both RiVIERA-MT and PAINTOR provides 90% credible sets, we further examined  
302 their functional enrichment for the eQTL SNPs from entire GTEx data over 44 tissues  
303 (**Fig. 7b**). Interestingly, the credible SNPs for BMI, HDL, TC and TG exhibit enrichment  
304 over majority of the tissues, perhaps implying a multifaceted causal mechanisms for these  
305 traits. On the other hand, the credible SNPs for CAD and LDL are highly selective of  
306 tissue types with CAD significantly enriched for artery tissues and LDL for liver tissue.  
307 T2D exhibits no obviously meaningful enrichment. The enrichment signals are generally  
308 consistent among the methods. Nonetheless, RiVIERA-MT achieved more significant eQTL  
309 enrichment than PAINTOR in all traits except T2D. However, caution must be taken to  
310 interpret these results because the enrichment analysis may be biased for the larger number  
311 of SNPs used to construct the 90% credible set and the eQTL SNPs themselves are not  
312 independent but rather linked by linkage disequilibrium, which violates the hypergeometric  
313 enrichment model assumption.

### 314 **3 Discussion**

315 Dissecting causal mechanisms of complex traits to ultimately map genotypes to phenotypes  
316 becomes plausible with the recent availability of large-scale functional genomic data [9, 23,  
317 30, 39]. In formulating an efficient fine-mapping strategies, it is natural to incorporate the  
318 valuable reference annotations in a principled way as a form of Bayesian prior to infer the  
319 functional variants that drive the genetic signals of GWAS [9, 15, 40–42]. In this article,  
320 we describe a novel Bayesian fine-mapping method RiVIERA-MT to re-prioritize GWAS  
321 summary statistics based on their epigenomic contexts and LD information. The main  
322 contribution of RiVIERA-MT is the ability to efficiently infer multiple causal variants within

323 a set of susceptible loci in a single trait or across multiple traits that do not need to share the  
324 same risk loci. Through comprehensive simulations and applications to GWAS datasets, we  
325 demonstrate the general utilities of RiVIERA-MT. Because our model only require summary  
326 statistics, we envision its broad applications in large-scale GWAS meta-analysis on many  
327 complex traits.

328 One caveat in our current model formalism is that the likelihood is based on *the given risk*  
329 *loci* rather than *genome-wide* SNPs. Here we made two implicit assumptions: (1) all of the  
330 genetic signals associated with the trait are captured within the risk loci; (2) majority of the  
331 SNPs within the risk loci are not causal and serve as background for fine-mapping the causal  
332 variants. This is true in our simulation, which was mainly used to assess how sensitive our  
333 model is to distinguish causal SNPs and causal annotations with different fold-enrichment of  
334 causal variants. In practice, this assumption may not hold especially for highly polygenetic  
335 model with small effect sizes. To detect causal annotations, a general enrichment test should  
336 be performed either on *genome-wide* independent loci such as fgwas [14] or on genome-  
337 wide SNPs such as the recently developed LD-score regression approach, which assesses the  
338 proportion of variance explained (PVE) due to the LD-linked SNPs from each functional  
339 category over the total estimated heritability [37].

340 As demonstrated in our applications to GWAS data, users may perform enrichment tests  
341 with a software of their choice and input to RiVIERA-MT a select set of annotations for fine-  
342 mapping. It is also worth mentioning that annotations that exhibit genome-wide enrichment  
343 may not be useful for fine-mapping purpose. Suppose we have an annotation that covers all  
344 of the risk loci. The corresponding enrichment for this annotation will be highly significant  
345 from genome-wide analysis but no different from background when focused within risk loci.  
346 Thus, annotations as such are important for inferring the risk loci but not for inferring  
347 individual risk variants. Therefore, it is still necessary to weight each annotations via the  
348 fine-mapping model.

349 As future works, we can extend our current RiVIERA-MT in several ways. First, our  
350 current eQTL enrichment analyses may be biased by the LD on the eQTL side and thus may  
351 merit more meaningful signals if we can infer the causal genes beyond individual variants  
352 by jointly modeling both the GWAS data and eQTL data. Second, we can generalize the  
353 model to apply for genome wide SNPs rather than defined risk loci via hierarchical modeling  
354 approach to infer risk loci and then the causal variants [14, 43]. Third, for traits that are  
355 associated with the same pleiotropic loci, we may provide the users an option to infer the  
356 joint posterior of SNP associations with multiple traits. Fourth, the current model can also  
357 be easily adapted to model trans-ethnic GWAS using separate LD matrices as effectively  
358 demonstrated by the trans-ethnic version of the PAINTOR model [33]. Fifth, instead of  
359 using the linear logistic prior model, we will explore other models that take into the spatial  
360 information of the genomic sequence and local epigenomic context around each SNP. Finally,  
361 the efficiency of our model can be further improved by paralleling the causal configuration  
362 searches via a multi-processing computing architecture.



## 363 4 Methods

### 364 4.1 Model details

#### 365 4.1.1 Likelihood and Bayes factor

We assume a linear model for quantitative trait of  $n$  individuals and  $p$  SNPs [17, 44]:

$$\mathbf{y} = \mathbf{X}\beta + \epsilon \quad (1)$$

$$\epsilon \sim \mathcal{N}(0, \sigma_e^2 I_n) \quad (2)$$

$$\beta \sim \mathcal{N}(0, \sigma_a^2 \sigma_e^2 I_c) \quad (3)$$

366 where  $\sigma_e^2$  is the standard error,  $\beta$  is the effect size with equal per-SNP additive variance  $\sigma_a^2$   
 367 for each causal SNP,  $I_n$  is identity matrix with ones in the diagonal and zeros elsewhere,  
 368 and  $I_c$  a diagonal matrix such that  $I_{i,i} = 1$  if SNP  $i$  is causal ( $c_i = 1$ ) otherwise 0 ( $c_i = 0$ ).  
 369 Notably, we assume the causal indicator  $\mathbf{c}$  is given here in order to integrate out the effect  
 370 size  $\beta$  and then subsequently infer the posterior distribution  $\mathbf{c}$  as detailed below.

As previously shown by [17, 18], we can integrate out  $\beta$  by taking the conditional expectation of the mean and variance of  $\mathbf{y}$  with respect to  $\beta$  ( $\mathbf{E}_\beta$ ) and leveraging the (log-transformed) linear property of the multivariate Gaussian density function:

$$\mathcal{N}(\mathbf{y}|\mathbf{X}, \sigma_a^2, \sigma_e^2, \mathbf{c}) = \int \mathcal{N}(\mathbf{y}|\mathbf{X}\beta, \sigma_e^2) \mathcal{N}(\beta|0, \sigma_a^2 \sigma_e^2 I_c) d\beta \quad (4)$$

$$= \mathcal{N}(y|\mathbf{E}(\mathbf{y}), \mathbf{E}(\text{Var}(\mathbf{y}))) \quad (5)$$

$$= \mathcal{N}(y|\mathbf{E}_\beta(\mathbf{y}|\mathbf{X}\beta), \mathbf{E}_\beta(\text{Var}(\mathbf{y}|\sigma_e^2, \mathbf{X}, \beta)) + \text{Var}(\mathbf{E}_\beta(\mathbf{y}|\sigma_e^2, \mathbf{X}, \beta))) \quad (6)$$

$$= \mathcal{N}(y|0, \sigma_e^2 I_n + \mathbf{X}(\sigma_e^2 \sigma_a^2 I_c) \mathbf{X}') \quad (7)$$

$$= \mathcal{N}(y|0, \sigma_e^2 (I_n + \mathbf{X}(\sigma_a^2 I_c) \mathbf{X}')) \quad (8)$$

We can then express the likelihood density function of Eq (1) in terms of  $z$ -score:

$$\mathbf{y}|\sigma_a^2, \sigma_e^2, \mathbf{c} \sim \mathcal{N}(0, \sigma_e^2 (I_n + \mathbf{X}(\sigma_a^2 I_c) \mathbf{X}')) \quad (9)$$

$$\frac{\mathbf{X}'\mathbf{y}}{\sqrt{n}}|\sigma_a^2, \sigma_e^2, \mathbf{c} \sim \mathcal{N}(0, \sigma_e^2 \left( \frac{\mathbf{X}'\mathbf{X}}{n} + \frac{\mathbf{X}'\mathbf{X}(\sigma_a^2 I_c)\mathbf{X}'\mathbf{X}}{n} \right)) \quad (10)$$

$$\mathbf{z} \equiv \frac{\mathbf{X}'\mathbf{y}}{\sqrt{n\sigma_e^2}}|\sigma_a^2, \mathbf{c} \sim \mathcal{N}(0, \Sigma + \Sigma(n\sigma_a^2 I_c)\Sigma) \quad (11)$$

371 where  $\Sigma = \mathbf{X}'\mathbf{X}/n$  is often referred to as the linkage equilibrium (LD) and estimated either  
 372 from the corresponding study cohort or a reference population from 1000 Genome Consor-  
 373 tium [38].

374 Thus, given the sample size,  $z$ -scores,  $\Sigma$  as the GWAS summary statistics, we can infer  
 375  $\mathbf{c}$  without the access to the individual-level genotype and phenotype information. Moreover,  
 376 we do not need to know the effect size  $\beta$  as it has been integrated out or  $\sigma_e^2$  as it has been  
 377 cancelled by the  $z$ -score calculation in (11).

The Bayes factor is the likelihood ratio of the alternative model over the null model:

$$BF(\mathbf{z}|\mathbf{c}, \Sigma, \sigma_a^2) = \frac{\mathcal{N}(\mathbf{z}|0, \Sigma + \Sigma(n\sigma_a^2 I_c)\Sigma)}{\mathcal{N}(\mathbf{z}|0, \Sigma)} \quad (12)$$

$$= \frac{\mathcal{N}(\mathbf{z}_c|0, \Sigma_{cc} + \Sigma_{cc}(n\sigma_a^2 I_c)\Sigma_{cc})\mathcal{N}(\mathbf{z}_n|\Sigma_{nc}\Sigma_{cc}^{-1}\mathbf{z}_c, \Sigma_{nn} - \Sigma_{nc}\Sigma_{cc}^{-1}\Sigma_{cn})}{\mathcal{N}(\mathbf{z}|0, \Sigma)} \quad (13)$$

$$= \frac{\mathcal{N}(\mathbf{z}_c|0, \Sigma_{cc} + \Sigma_{cc}(n\sigma_a^2 I_c)\Sigma_{cc})}{\mathcal{N}(\mathbf{z}|0, \Sigma)} \frac{\mathcal{N}(\mathbf{z}|0, \Sigma)}{\mathcal{N}(\mathbf{z}_c|0, \Sigma_{cc})} \quad (14)$$

$$= \frac{\mathcal{N}(\mathbf{z}_c|0, \Sigma_{cc} + \Sigma_{cc}(n\sigma_a^2 I_c)\Sigma_{cc})}{\mathcal{N}(\mathbf{z}_c|0, \Sigma_{cc})} \quad (15)$$

$$= BF(\mathbf{z}_c|\Sigma_{cc}, \sigma_a^2) \quad (16)$$

378 where  $\mathbf{z}_c$  and  $\Sigma_{cc}$  denote z-scores and LD for the causal SNPs, respectively. Notably, Eq (15)  
 379 is much more efficient than Eq (12) because it operates only on the causal SNPs instead of  
 380 all of the SNPs.

381 Suppose there are  $D$  diseases,  $L_d$  independent risk loci for disease  $d$ ,  $m_{ld}$  SNPs in locus  
 382  $l$ . The joint likelihood expressed in terms of Bayes factor is factorized into products of  
 383 individual likelihoods over loci across traits:

$$\mathcal{L}(\mathbf{c}|\mathbf{z}, \Sigma) = \prod_{d=1}^D \prod_{l=1}^{L_d} BF(\mathbf{z}_{ld}|\mathbf{c}_{ld}, \Sigma_{ld}) \quad (17)$$

#### 384 4.1.2 Prior

385 The prior distribution of being a causal SNP in locus  $l$  and disease  $d$  follows Bernoulli  
 386 distribution:

$$p(\mathbf{c}_{ld}|\mathbf{a}, \mathbf{w}) = \prod_{i=1}^{m_l} \pi_{ild}^{c_{ild}} (1 - \pi_{ild})^{(1-c_{ild})} \quad (18)$$

387 where  $\pi_{ild}$  is a logistic function of a linear combination of  $K$  annotations weighted by model  
 388 parameters  $\mathbf{w}$ :

$$\pi_{ild} = [1 + \exp(-\sum_{k=1}^K w_{kd}a_{ilk} - b_{ld})]^{-1} \quad (19)$$

Here  $\mathbf{w} = \{w_{kd}\}_{K \times D}$  follows multivariate normal distribution with  $D \times D$  covariance  $\Sigma_w$  modeling the underlying *disease-disease covariance* at the annotation level, and the inverse of the covariance  $\Sigma_w^{-1} = \Lambda_w$  follows Wishart distribution:

$$\mathbf{w}|\Lambda_w \sim \mathcal{N}(0, \Lambda_w^{-1}) \quad (20)$$

$$\Lambda_w|\Lambda_0, \nu_0 \sim \mathcal{W}(\Lambda_0, \nu_0) \quad (21)$$

The linear bias  $b_{ld}$  in (19) follows a univariate normal with mean equal to the logit function of causal proportion  $\pi_{0,ld}$  within locus  $l$  of disease  $d$  and the inverse variance follows Gamma

distribution:

$$b_{ld}|\pi_{0,ld}, \lambda_{0d}, \sim \mathcal{N}(g(\pi_{0,ld}), \lambda_{0d}^{-1}) \quad (22)$$

$$\lambda_{0d}|\alpha_0, \beta_0 \sim \Gamma(\alpha_0, \beta_0) \quad (23)$$

389 where  $g(\pi_0) = \log(\pi_0)/\log(1 - \pi_0)$  and  $\pi_0 = 1/m_{ld}$ , which implies *a priori* one causal variant  
390 per locus, and we set  $\alpha = 0.01$  and  $\beta = 0.0001$  to enable a broad hyperprior for  $\lambda_{0d}$ .

### 391 4.1.3 Approximate posterior inference of causal configurations

Based on the results above, posterior inference of a causal configuration for locus  $l$  in disease  $d$  can operate on Bayes factors as follows:

$$\begin{aligned} & p(\mathbf{c}_{ld}|\mathbf{z}_{ld}, \Sigma_{ld}, \mathbf{a}_{ld}, \mathbf{w}_d, \sigma_a^2) \\ &= \frac{p(\mathbf{z}_{ld}|\mathbf{c}_{ld}, \Sigma_{ld})p(\mathbf{c}_{ld}|\mathbf{a}_{ld}, \mathbf{w}_d)}{\sum_{\mathbf{c}'_{ld} \in \mathcal{S}_{ld}} p(\mathbf{z}_{ld}|\mathbf{c}'_{ld}, \Sigma_{ld})p(\mathbf{c}'_{ld}|\mathbf{a}, \mathbf{w})} \end{aligned} \quad (24)$$

$$= \frac{\frac{\mathcal{N}(\mathbf{z}_{ld}|0, \Sigma_{ld} + \Sigma_{ld}(n_d \sigma_{a,d}^2 I_{c,d}) \Sigma_{ld})}{\mathcal{N}(\mathbf{z}_{ld}|0, \Sigma_{ld})} p(\mathbf{c}_{ld}|\mathbf{a}_{ld}, \mathbf{w}_d)}{\sum_{\mathbf{c}'_{ld} \in \mathcal{S}_{ld}} \frac{\mathcal{N}(\mathbf{z}_{ld}|0, \Sigma_{ld} + \Sigma_{ld}(n_d \sigma_{a,d}^2 I_{c',d}) \Sigma_{ld})}{\mathcal{N}(\mathbf{z}_{ld}|0, \Sigma_{ld})} p(\mathbf{c}'_{ld}|\mathbf{a}, \mathbf{w})} \quad (25)$$

$$= \frac{\frac{\mathcal{N}(\mathbf{z}_{c,ld}|0, \Sigma_{cc,ld} + \Sigma_{cc,ld}(n_d \sigma_{a,d}^2 I_c) \Sigma_{cc,ld})}{\mathcal{N}(\mathbf{z}_{c,ld}|0, \Sigma_{cc,ld})} p(\mathbf{c}_{ld}|\mathbf{a}_{ld}, \mathbf{w}_d)}{\sum_{\mathbf{c}'_{ld} \in \mathcal{S}_{ld}} \frac{\mathcal{N}(\mathbf{z}_{c',ld}|0, \Sigma_{c'c',ld} + \Sigma_{c'c',ld}(n_d \sigma_{a,d}^2 I_{c',ld}) \Sigma_{c'c',ld})}{\mathcal{N}(\mathbf{z}_{c',ld}|0, \Sigma_{c'c',ld})} p(\mathbf{c}'_{ld}|\mathbf{a}_{ld}, \mathbf{w}_d)} \quad (26)$$

$$= \frac{BF(\mathbf{z}_{c,ld}|\Sigma_{cc,ld}, \sigma_{a,d}^2) p(\mathbf{c}_{ld}|\mathbf{a}_{ld}, \mathbf{w}_d)}{\sum_{\mathbf{c}'_{ld} \in \mathcal{S}_{ld}} BF(\mathbf{z}_{c',ld}|\Sigma_{c'c',ld}, \sigma_{a,d}^2) p(\mathbf{c}'_{ld}|\mathbf{a}_{ld}, \mathbf{w}_d)} \quad (27)$$

$$\equiv \frac{BF(\mathbf{z}_{ld}|\mathbf{c}_{ld}, \Sigma_{ld}, \sigma_{a,d}^2) p(\mathbf{c}_{ld}|\mathbf{a}_{ld}, \mathbf{w}_d)}{\sum_{\mathbf{c}'_{ld} \in \mathcal{S}_{ld}} BF(\mathbf{z}_{ld}|\mathbf{c}'_{ld}, \Sigma_{ld}, \sigma_{a,d}^2) p(\mathbf{c}'_{ld}|\mathbf{a}_{ld}, \mathbf{w}_d)} \quad (28)$$

392 where Eq (25) to Eq (26) utilizes the results from Eq (15). Thus, we can infer Eq (24) by Eq  
393 (27) using Bayes factor of only the causal SNPs, which is much more efficient than inferring  
394 the likelihood of all of the SNPs in the locus. To simplify notation below, we use Eq (28)  
395 instead of Eq (27).

396 However, the normalization term in the denominator of Eq (28) still requires evaluation of  
397  $\sum_{j=1}^{m_{ld}} \binom{m_{ld}}{j}$  causal configurations, which becomes intractable for large  $m_{ld}$ . We approximate  
398 it by recursively sampling from the neighborhoods of the current configuration plausible  
399 configurations based on their posterior normalized only within the neighborhood. By doing  
400 so, we ignore the majorities of the highly implausible configurations that likely contribute  
401 very little to the normalization [18, 35]. This stochastic search technique was initially devel-  
402 oped by [35] as general feature selection algorithm, and was first implemented to fine-map  
403 causal variants in the software called FINEMAP [18]. However, FINEMAP infers causal  
404 variants on a single locus individually (i.e., no information sharing among loci), works for  
405 only a single trait, does not take into account functional annotations, and accepts all pro-  
406 posed configurations. In contrast, our model infer causal variants across multiple loci with  
407 model parameters shared among loci, can operate on multiple traits simultaneously, harness-  
408 ing large-scale functional and epigenomic annotations, and exploits an sampling scheme to  
409 ensure the quality of the neighborhood that the model is exploring (detailed as follows).

410 We apply Metropolis-Hastings (MH) algorithm to accept the proposed configuration  $\mathbf{c}_{ld}^*$   
 411 at the probability:

$$\min\left(1, \frac{\sum_{\mathbf{c}_{ld}'' \in \text{nbrd}(\mathbf{c}_{ld}^*)} BF(\mathbf{z}_{ld}|\mathbf{c}_{ld}'', \Sigma_{ld}, \sigma_{a,d}^2) p(\mathbf{c}_{ld}''|\mathbf{a}_{ld}, \mathbf{w}_d)}{\sum_{\mathbf{c}_{ld}' \in \text{nbrd}(\mathbf{c}_{ld}^{cur})} BF(\mathbf{z}_{ld}|\mathbf{c}_{ld}', \Sigma_{ld}, \sigma_{a,d}^2) p(\mathbf{c}_{ld}'|\mathbf{a}_{ld}, \mathbf{w}_d)}\right) \quad (29)$$

412 Notably, in contrast to standard MH, our proposed MH step compares the *neighborhood*  
 413 of the proposed causal configuration (including the proposed configuration itself) with the  
 414 *neighborhood* of the current causal configuration. Compared to standard MH on single con-  
 415 figuration, the neighborhood-based MH approach is more effective in accepting configuration  
 416 space with larger improvement and thus less prone to random walk behavior [35].

417 Furthermore, we use an unordered hash table to efficiently keep track of all of the evalu-  
 418 ated configurations throughout the MH stochastic samplings and to avoid re-computing the  
 419 already visited configurations, which is the same as in FINEMAP [18]. However, different  
 420 from FINEMAP, we need to re-initialize the hash table at each complete iteration because  
 421 the prior distribution changes (which changes the posterior distribution of the causal config-  
 422 urations) after new annotation weights  $\mathbf{w}$  are sampled from the posterior (detailed next).

423 The posterior inclusion probabilities (PIP) for SNP  $i$  in locus  $l$  of disease  $d$  is then:

$$p(c_{ild}|\mathbf{z}_{ld}, \Sigma_{ld}, \mathbf{a}_{ld}, \mathbf{w}_d, \sigma_a^2) = \sum_{\mathbf{c}_{ld} \in \mathcal{S}_{ld}^*, c_{ild}=1} \frac{BF(\mathbf{z}_{ld}|\mathbf{c}_{ld}, \Sigma_{ld}, \sigma_{a,d}^2) p(\mathbf{c}_{ld}|\mathbf{a}_{ld}, \mathbf{w}_d)}{\sum_{\mathbf{c}_{ld}' \in \mathcal{S}_{ld}^*} BF(\mathbf{z}_{ld}|\mathbf{c}_{ld}', \Sigma_{ld}, \sigma_{a,d}^2) p(\mathbf{c}_{ld}'|\mathbf{a}, \mathbf{w})} \quad (30)$$

424 where  $\mathcal{S}_{ld}^*$  is the set of visited configurations.

#### 425 4.1.4 Joint posterior

Given PIP, the logarithmic joint posterior density function is then:

$$\log p(\Theta|\mathcal{D}) = \log f(\mathbf{w}, \Lambda_w, \mathbf{b}, \lambda, \sigma_a^2|\mathbf{z}, \Sigma, \mathbf{a}, \mathbf{c}) \quad (31)$$

$$\propto \log f(\mathbf{w}|\Lambda_w) + \log f(\Lambda_w|\Lambda_0, \nu_0) \quad (32)$$

$$+ \sum_{d=1}^D \sum_{l=1}^{L_d} \log f(b_{ld}|m_{ld}, \lambda_{ld}) + \sum_{d=1}^D \log f(\lambda_d|\alpha_0, \beta_0) \quad (33)$$

$$+ \sum_{d=1}^D \log f(\sigma_{a,d}^2) \quad (34)$$

$$+ \sum_{d=1}^D \sum_{l=1}^{L_d} \log f(\mathbf{z}_{ld}|\mathbf{c}_{ld}, \Sigma_{ld}, \sigma_{a,d}) + \log f(\mathbf{c}_{ld}|\mathbf{a}_{ld}, \mathbf{w}_d, \mathbf{b}_{ld}) \quad (35)$$

$$(36)$$

426 In principle, causal inference requires integrating out all of above parameters:

$$p(c_{ild}|\mathbf{z}_d, \Sigma_d, \mathbf{a}_d) = \int p(c_{ild}|\Theta, \mathcal{D}) p(\Theta|\mathcal{D}) d\Theta \quad (37)$$

427 which is not tractable. We employ Markov Chain Monte Carlo (MCMC) to sample from the  
 428 joint posterior in Eq (31).

#### 429 4.1.5 Sampling genetic additive variance $\sigma_{a,d}^2$

In our BF formulation,  $\sigma_{a,d}^2$  is a free hyperparameter. Existing fine-mapping methods such as FINEMAP [18] and CAVIARBF [17] set it to a fixed user-defined value. Here, as first proposed by Guan and Stephen (2011) [31], we associate  $\sigma_{a,d}^2$  to the underlying heritability estimate  $h_d^2$  of disease  $d$ :

$$h_d^2 = \frac{m_d \sigma_{a,d}^2}{m_d \sigma_{a,d}^2 + \sigma_{e,d}^2} \quad (38)$$

$$= \frac{m_d \sigma_{a,d}^2 / \sigma_{e,d}^2}{m_d \sigma_{a,d}^2 / \sigma_{e,d}^2 + 1} \quad (39)$$

$$\sigma_{a,d}^2 / \sigma_{e,d}^2 = \frac{h_d^2}{m_d (1 - h_d^2)} \quad (40)$$

$$= \frac{h_d^2}{1 - h_d^2} \left( \sum_{l=1}^{L_d} \sum_{i=1}^{m_d} c_{ild} \right)^{-1} \quad (41)$$

430 In practice, we sample  $h_d^2$  from uniform:  $h_d^{2*} \leftarrow h_d + U(-0.1, 0.1)$  and re-parameterize it to  
 431 get  $\sigma_{a,d}^2 / \sigma_{e,d}^2$  (41). We then apply MH to accept the proposed  $h_d^{2*}$  (and hence  $\sigma_{a,d}^{2*} / \sigma_{e,d}^2$ ) at  
 432 the probability:

$$\min\left(1, \frac{\prod_l \sum_{c_{ld}} BF(\mathbf{z}_{ld} | \mathbf{c}_{ld}, \Sigma_{ld}, \sigma_{a,d}^{2*}) p(\mathbf{c}_{ld} | \mathbf{a}, \mathbf{w})}{\prod_l \sum_{c_{ld}} BF(\mathbf{z}_{ld} | \mathbf{c}_{ld}, \Sigma_{ld}, \sigma_{a,d}^2) p(\mathbf{c}_{ld} | \mathbf{a}, \mathbf{w})}\right) \quad (42)$$

433 Note that we do not need to estimate  $\sigma_{e,d}^2$  because it is the same for all configurations and  
 434 thus cancelled out in Eq (24). Also, our main goal here is to fine-map causal variants rather  
 435 than estimating heritability. For the latter, readers may refer to a recently proposed model  
 436 on estimating effect size (which we have integrated out) and heritability using summary  
 437 statistics (Zhu and Stephen, bioRxiv 2016).

#### 438 4.1.6 Sampling model parameters $\Lambda_w, \lambda, \mathbf{w}, \mathbf{b}$

439 We use Gibbs sampling [45] to sample the precision matrix  $\Lambda_w$  of epigenomic effects from  
 440 the posterior distribution. Specifically, Gibbs sampling requires a closed form posterior  
 441 distribution. Due to the conjugacy of the Wishart prior of epigenomic precision matrix  $\Lambda_w$  to  
 442 the multivariate normal distribution of epigenomic effect  $\mathbf{w}$ , the posterior of the epigenomic  
 443 precision matrix  $\Lambda_w$  also follows Wishart distribution [46]:

$$\Lambda_w | \mathbf{w} \sim \mathcal{W}((\Lambda_0^{-1} + \mathbf{w}'\mathbf{w})^{-1}, \nu_0 + K) \quad (43)$$

444 Similarly, we sample  $\lambda_{ld}$  from Gamma posterior distribution:

$$\lambda_{ld} | b_{ld} \sim \Gamma(\alpha_0 + 0.5, (\beta_0 + \frac{(b_{ld} - g(\pi_{ld}))^2}{2})^{-1}) \quad (44)$$

445 To sample epigenomic effects  $\mathbf{w}$  and prior bias  $\mathbf{b}$  for disease  $d = 1, \dots, D$  and locus  $l =$   
 446  $1, \dots, L_d$ , we employ a more powerful gradient-based sampling scheme namely Hamiltonian  
 447 Monte Carlo (also known as hybrid Monte Carlo) (HMC) [47, 48], exploiting the fact that  
 448 the joint posterior of our model is differentiable with respect to the model parameters  $\mathbf{w}$  and  
 449  $\mathbf{b}$  (**Supplementary Information**).



#### 450 4.1.7 Functional enrichment

To assess functional enrichment of a given annotation, we propose a Bayesian likelihood ratio tests. Specifically, at  $t^{th}$  MCMC sampling iteration, we compare the likelihood of the null model that does not use annotation  $k$  ( $\mathcal{L}_0^{(t)}$ ) with the likelihood of the alternative model that does ( $\mathcal{L}_1^{(t)}$ ):

$$\mathcal{L}_0^{(t)} = \sum_l \log \sum_{\mathbf{c}_{ld}} p(\mathbf{z}_{ld} | \mathbf{c}_{ld}, \Sigma_{ld}, \Theta_0^{(t)}) p(\mathbf{c}_{ld} | \Theta_0^{(t)}) \quad (45)$$

$$\mathcal{L}_1^{(t)} = \sum_l \log \sum_{\mathbf{c}_{ld}} p(\mathbf{z}_{ld} | \mathbf{c}_{ld}, \Sigma_{ld}, \mathbf{a}_{ldk}, \Theta_1^{(t)}) p(\mathbf{c}_{ld} | \mathbf{a}_{ldk}, \Theta_1^{(t)}) \quad (46)$$

$$\Delta \mathcal{L}_k^{(t)} = -2(\mathcal{L}_0^{(t)} - \mathcal{L}_1^{(t)}) \sim \chi^2(1) \quad (47)$$

451 where  $\chi^2(1)$  is chi-squared distribution with one degree of freedom that we use to assess the  
452 significance of the annotation. The Bayesian credible interval of  $\Delta \mathcal{L}_k^{(t)}$  forms naturally over  
453 the sampled model parameters and causal configurations after discarding the initial 20% of  
454 sampled values during burn-in period.

#### 455 4.2 GWAS simulation

456 To assess the power of the proposed fine-mapping model in identifying causal variants and  
457 compare it with existing methods, we implemented a simulation pipeline adapted from [15].  
458 Details are described in **Supplementary Information**. Briefly, the simulation can be  
459 divided into four steps:

- 460 1. simulate genotypes based on the haplotypes from 1000 Genome data (phase 1 version  
461 3) using HapGen2 [49];
- 462 2. sample epigenomic enrichments from uniform distribution with maximum fold-enrichment  
463 defined by the total number of causal variants and the total number of variants har-  
464 bored in that annotation and then randomly sample causal variants according to the  
465 simulated fold-enrichments from each of the 100 epigenomic annotations selected from  
466 19 categories of primary tissue/cell types;
- 467 3. simulate phenotypes as a linear combination of the causal effect sizes plus random  
468 zero-mean Gaussian noise with pre-determined variance to achieve a given heritability  
469  $h_g^2$  (fixed at 0.25 unless mentioned otherwise);
- 470 4. compute p-values and z-scores (as  $t$ -statistics) by regressing phenotype on each SNP.

#### 471 4.3 GWAS summary statistics and imputation

472 Overall, the summary statistics of each GWAS trait were downloaded from public do-  
473 mains. For each study, we first removed strand-ambiguous SNP (T/A, C/G) as well as  
474 SNPs with supporting sample sizes lower than a threshold. For BMI and the four lipid  
475 traits (HDL, LDL, TC, TG), we require for SNPs to have the minimum sample size of 80,000.

476 For CAD (T2D), we obtained only SNPs supported by at least 15,000 (9,000) cases and  
477 50,000 (50,000) controls. We then imputed summary statistics using ImpG (v1.0.1) (<https://github.com/huwenboshi/ImpG>) [50] to 1000 Genome Phase 1 (version 3) data. Only the  
478 imputed SNPs with imputation quality measured as  $r^2 > 0.6$  were retained. We then ob-  
479 tained the lead SNPs reported by each study and the SNPs within 100 kb genomic distance  
480 of the lead SNPs to form the genome-wide significant independent risk loci as the inputs  
481 to our fine-mapping algorithm. Table S1 summarizes the data from each individual GWAS  
482 study.  
483

#### 484 **4.4 Running existing fine-mapping software on simulated data**

485 The software `fgwas` [14] (version 0.3.4) were downloaded from GitHub. To enable fine-  
486 mapping, we issued `-fine` flag and specify the region numbers for each SNP in the input file as  
487 required by the software. GPA (0.9-3) [16] was downloaded from GitHub and run with default  
488 settings. To test for trait-relevant annotations, we followed the package vignette. Briefly,  
489 we fit two GPA models with and without the annotation and compared the two models by  
490 `aTest` function from GPA, which performs likelihood-ratio (LR) test via  $\chi^2$  approximation,  
491 and obtained the enrichment scores as the  $-\log_{10}$  p-value. PAINTOR (version 2.1) was  
492 downloaded from GitHub [15]. As suggested in the documentation, we prepared a list of  
493 input files for every locus including summary statistics as t-statistics, LD matrices, and  
494 binary epigenomic annotations. We ran the software with default setting with assumption  
495 of at most two causal variants per locus.

#### 496 **4.5 LD score regression for functional enrichment**

497 We obtained the LD score regression software LDSC (v1.0.0) (<https://github.com/bulik/ldsc>)  
498 to determine functional enrichments of the GWAS traits by partitioning heritabilities  
499 according to the variance explained by the LD-linked SNPs belonging to each functional  
500 categories [37]. Following the online LDSC manual (the partitioned heritability page), we  
501 first trained a baseline LDSC model using the 52 non-cell-type specific functional categories  
502 (plus one category that includes all SNPs) using the observed Z-scores of HapMap3 SNPs for  
503 each trait. We then trained 220 models on cell-type-specific annotations including 4 histone  
504 marks (H3K4me1, H3K4me3, H3K9ac, H3K27ac) and 100 well-defined cell types. For fine-  
505 mapping causal variants, we chose baseline and cell-type-specific epigenomic annotations  
506 with p-value  $< 0.05$  adjusted by Benjamini-Hochberg method across 272 annotations over the  
507 7 traits (i.e., 1,904 tests in total).

#### 508 **4.6 Code availability**

509 RiVIERA-MT software implemented as a standalone open-source R package is freely avail-  
510 able from Github repository <https://github.mit.edu/pages/liyue/riviera/>.

## 511 Figure Legends

Figure 1: Fine-mapping problem illustration. Three case scenarios were simulated to illustrate the fine-mapping problem (left-right): one causal variant, 3 causal variant, 10 causal variants within the locus. In each case, there are four types of data (top-bottom): genetic signals as GWAS  $-\log_{10}$  p-values, epigenomic activities as cumulative counts of overlapping SNPs over the 100 epigenomic annotations (where the causal variants were enriched in some annotations), inferred posterior inclusion probabilities (PIP), linkage disequilibrium matrix of the simulated genomic region. The causal variants are the red diamond and highlighted by the vertical line to aid visualization.

Figure 2: Functional enrichments and RiVIERA-MT model. **a.** Functional enrichments of cell-type-specific annotations across 7 traits. Heatmap illustrates the underlying co-enrichment of the 7 related traits (columns) across many cell or tissue types (rows). The intensities reflect the  $-\log_{10}$  p-values from LDSC estimate [37]. Red boxes highlighted known relevant tissues for the corresponding traits. **b.** Stochastic sampling of causal configurations. The sampling scheme was adapted from [18,35]. For simplicity, we display a locus of 3 SNPs with 0 and 1 indicating non-causal and causal status. Starting from 1 causal variant per locus on the left, we have 3 choices to place the causal status in each of the variants. Suppose we sample the configuration '010' (highlighted in red box) based on its posterior probabilities relative to the other two configurations. We then apply 3 types of operations that define the "neighborhood" of the current configuration (i.e.,  $\text{nbrd}(010)$ ): (1) adding one causal variant; (2) removing one causal variant (we do not consider this step when there is only one causal variant in the configuration); (3) swapping causal variant with a non-causal variant. We then sample from the posterior normalized within the neighborhood of '010' a new configuration, say '110' and compare the joint posteriors of the proposed configuration namely '110' and that of the current configuration namely '010' to determine whether we should accept the proposal and so on. **c.** RiVIERA-MT expressed in probabilistic graphical model. Shaded nodes are observed data and unshaded are latent variables or model parameters. The plates represent repeated pattern of same entities as indexed by  $l$  for loci,  $k$  for annotations, and  $d$  for diseases. The meaning of each variant is annotated beside each node. Please refer to the main text for details.

Figure 3: Power comparison on inferring causal variant. Proportion of causal variants is plotted as a function of increasing number of variants selected by 7 SNP prioritization methods. The boxplots are based on 500 independent simulations.

Figure 4: Functional enrichment analysis. We estimated the enrichment of each annotations based on likelihood ratio tests. The y-axis is the estimate and the x-axis is the underlying fold-enrichments that were used to sample the causal variants from the corresponding annotation. The error bar indicates the 90% credible interval of the Bayesian LRT estimates by RiVIERA-MT. The inset boxplot display the overall correlations based on 100 simulations.

Figure 5: Inferring variants across multiple traits. We ran RiVIERA-MT single-trait and multi-trait modes on the simulated data containing 2-10 traits that do not have the same risk loci but related via the correlation of functional fold-enrichments. The y-axis indicates the average number of SNPs per locus required to detect 90% causal variants over 100 simulations per number of traits (x-axis). The top and bottom panels are the performance of the empirical prior and posterior, respectively. The left and right columns indicate binary noise-free annotations (i.e., the underlying annotations from which the causal SNPs were sampled from) and noisy annotations (i.e., standardized and scaled continuous annotations ranging from -1 and 1).

Figure 6: Venn diagrams of the number shared variants predicted by each method. For RiVIERA-MT single-trait (`riviera.st`), RiVIERA-MT multi-trait mode (`riviera_mt`), and PAINTOR, we constructed 90% credible sets, and for GWAS  $-\log P$  (`gwas_logp`) we took the genome-wide significant SNP with  $p < 5E-8$ . The bottom right plot displaying the model confidence in terms median posterior for each SNP within the 90% credible SNPs as a function of increasing number of supporting methods.

Figure 7: Enrichments of GTEx eQTL SNPs. **a.** The hypergeometric enrichment of SNPs in the GTEx whole blood eQTL SNPs as a function of increasing number of top variants chosen by each method. **b.** Same as **a** except the tissue-specific eQTL SNPs were chosen for each trait. **c.** Heatmap of enrichments of eQTL SNPs across 44 GTEx tissues. We overlapped the 90% credible sets predicted by each method for each trait with the GTEx eQTL SNPs. The color intensities are based on BH-adjusted  $-\log_{10}$  p-values of hypergeometric enrichment tests.

## References

1. Burton, P. R. *et al.* Genome-wide association study of 14,000 cases of seven common diseases and 3,000 shared controls. *Nature* **447**, 661–678 (2007).
2. Wray, N. R., Goddard, M. E. & Visscher, P. M. Prediction of individual genetic risk of complex disease. *Current Opinion in Genetics & Development* **18**, 257–263 (2008).
3. Hindorff, L. A. *et al.* Potential etiologic and functional implications of genome-wide association loci for human diseases and traits. *Proceedings of the National Academy of Sciences* **106**, 9362–9367 (2009).

4. Visscher, P. M., Brown, M. A., McCarthy, M. I. & Yang, J. Five years of gwas discovery. *The American Journal of Human Genetics* **90**, 7–24 (2012).
5. Welter, D. *et al.* The nhgri gwas catalog, a curated resource of snp-trait associations. *Nucleic acids research* **42**, D1001–D1006 (2014).
6. Ernst, J. *et al.* Mapping and analysis of chromatin state dynamics in nine human cell types. *Nature* **473**, 43–49 (2011).
7. Consortium, R. E. *et al.* Integrative analysis of 111 reference human epigenomes. *Nature* **518**, 317–330 (2015).
8. Ward, L. D. & Kellis, M. Interpreting noncoding genetic variation in complex traits and human disease. *Nature Biotechnology* **30**, 1095–1106 (2012).
9. Trynka, G. *et al.* Chromatin marks identify critical cell types for fine mapping complex trait variants. *Nature genetics* **45**, 124–130 (2013).
10. Maurano, M. T. *et al.* Systematic localization of common disease-associated variation in regulatory dna. *Science* **337**, 1190–1195 (2012).
11. Hnisz, D. *et al.* Super-enhancers in the control of cell identity and disease. *Cell* **155**, 934–947 (2013).
12. Lindblad-Toh, K. *et al.* A high-resolution map of human evolutionary constraint using 29 mammals. *Nature* **478**, 476–482 (2011).
13. Schaub, M. A., Boyle, A. P., Kundaje, A., Batzoglou, S. & Snyder, M. Linking disease associations with regulatory information in the human genome. *Genome research* **22**, 1748–1759 (2012).
14. Pickrell, J. K. Joint Analysis of Functional Genomic Data and Genome-wide Association Studies of 18 Human Traits. *The American Journal of Human Genetics* **94**, 559–573 (2014).
15. Kichaev, G. *et al.* Integrating functional data to prioritize causal variants in statistical fine-mapping studies. *PLoS genetics* **10**, e1004722 (2014).
16. Chung, D., Yang, C., Li, C., Gelernter, J. & Zhao, H. GPA: A Statistical Approach to Prioritizing GWAS Results by Integrating Pleiotropy and Annotation. *PLoS Genetics* **10**, e1004787 (2014).
17. Chen, W. *et al.* Fine Mapping Causal Variants with an Approximate Bayesian Method Using Marginal Test Statistics. *Genetics* **200**, 719–736 (2015).
18. Benner, C. *et al.* FINEMAP: Efficient variable selection using summary data from genome-wide association studies. *Bioinformatics (Oxford, England)* (2016).
19. Anttila, V. *et al.* An atlas of genetic correlations across human diseases and traits. *Nature Genetics* 1–9 (2015).



20. Pickrell, J. K. *et al.* Detection and interpretation of shared genetic influences on 42 human traits. *Nature Genetics* 1–10 (2016).
21. Nikpay, M. *et al.* A comprehensive 1,000 Genomes-based genome-wide association meta-analysis of coronary artery disease. *Nature Genetics* **47**, 1121–1130 (2015).
22. Burton, P. R. *et al.* Association scan of 14,500 nonsynonymous SNPs in four diseases identifies autoimmunity variants. *Nature Genetics* **39**, 1329–1337 (2007).
23. Onengut-Gumuscu, S. *et al.* Fine mapping of type 1 diabetes susceptibility loci and evidence for colocalization of causal variants with lymphoid gene enhancers. *Nature Genetics* **47**, 381–386 (2015).
24. of the Psychiatric Genomics Consortium, C.-D. G. *et al.* Identification of risk loci with shared effects on five major psychiatric disorders: a genome-wide analysis. *The Lancet* **381**, 1371–1379 (2013).
25. O’Dushlaine, C. *et al.* Psychiatric genome-wide association study analyses implicate neuronal, immune and histone pathways. *Nature Neuroscience* **18**, 199–209 (2015).
26. Speliotes, E. K. *et al.* Association analyses of 249,796 individuals reveal 18 new loci associated with body mass index. *Nature Genetics* **42**, 937–948 (2010).
27. Schunkert, H. *et al.* Large-scale association analysis identifies 13 new susceptibility loci for coronary artery disease. *Nature Genetics* **43**, 333–338 (2011).
28. Teslovich, T. M. *et al.* Biological, clinical and population relevance of 95 loci for blood lipids. *Nature* **466**, 707–713 (2010).
29. Morris, A. P. *et al.* Large-scale association analysis provides insights into the genetic architecture and pathophysiology of type 2 diabetes. *Nature Genetics* **44**, 981–990 (2012).
30. Farh, K. K.-H. *et al.* Genetic and epigenetic fine mapping of causal autoimmune disease variants. *Nature* **518**, 337–343 (2015).
31. Guan, Y. & Stephens, M. Bayesian variable selection regression for genome-wide association studies and other large-scale problems. *The Annals of Applied Statistics* **5**, 1780–1815 (2011).
32. Kichaev, G. *et al.* Improved methods for multi-trait fine mapping of pleiotropic risk loci. *bioRxiv* (2016). URL <http://biorxiv.org/content/early/2016/05/21/054684.1>. <http://biorxiv.org/content/early/2016/05/21/054684.1.full.pdf>.
33. Kichaev, G. & Pasaniuc, B. Leveraging Functional-Annotation Data in Trans-ethnic Fine-Mapping Studies. *American journal of human genetics* **97**, 260–271 (2015).
34. Hormozdiari, F., Kichaev, G., Yang, W.-Y., Pasaniuc, B. & Eskin, E. Identification of causal genes for complex traits. *Bioinformatics* **31**, i206–i213 (2015).

35. Hans, C., Dobra, A. & West, M. Shotgun Stochastic Search for “Large p” Regression. *Journal of the American Statistical Association* **102**, 507–516 (2007).
36. Gusev, A. *et al.* Partitioning Heritability of Regulatory and Cell-Type-Specific Variants across 11 Common Diseases. *AJHG* **95**, 535–552 (2014).
37. Finucane, H. K. *et al.* Partitioning heritability by functional annotation using genome-wide association summary statistics. *Nature Genetics* **47**, 1228–1235 (2015).
38. Consortium, T. . G. P. *et al.* An integrated map of genetic variation from 1,092 human genomes. *Nature* **490**, 56–65 (2013).
39. Durbin, R. M. *et al.* A map of human genome variation from population-scale sequencing. *Nature* **467**, 1061–1073 (2010).
40. Maller, J. B. *et al.* Bayesian refinement of association signals for 14 loci in 3 common diseases. *Nature genetics* **44**, 1294–1301 (2012).
41. Wen, X., Luca, F. & Pique-Regi, R. Cross-population joint analysis of eQTLs: fine mapping and functional annotation. *PLoS genetics* **11**, e1005176 (2015).
42. Wallace, C. *et al.* Dissection of a complex disease susceptibility region using a bayesian stochastic search approach to fine mapping. *bioRxiv* 015164 (2015).
43. Wen, X., Lee, Y., Luca, F. & Pique-Regi, R. Efficient Integrative Multi-SNP Association Analysis via Deterministic Approximation of Posteriors. *American journal of human genetics* **98**, 1114–1129 (2016).
44. Servin, B. & Stephens, M. Imputation-Based Analysis of Association Studies: Candidate Regions and Quantitative Traits. *PLoS Genetics* **3**, e114 (2007).
45. Geman, S. & Geman, D. Stochastic relaxation, gibbs distributions, and the bayesian restoration of images. *Pattern Analysis and Machine Intelligence, IEEE Transactions on PAMI-6*, 721–741 (1984).
46. Bernardo, J. M. & Smith, A. F. *Bayesian theory*, vol. 405 (John Wiley & Sons, 2009).
47. Duane, S., Kennedy, A. D., Pendleton, B. J. & Roweth, D. Hybrid monte carlo. *Physics letters B* **195**, 216–222 (1987).
48. Neal, R. M. Mcmc using hamiltonian dynamics. *Handbook of Markov Chain Monte Carlo* **2** (2011).
49. Su, Z., Marchini, J. & Donnelly, P. HAPGEN2: simulation of multiple disease SNPs. *Bioinformatics (Oxford, England)* **27**, 2304–2305 (2011).
50. Pasaniuc, B. *et al.* Fast and accurate imputation of summary statistics enhances evidence of functional enrichment. *Bioinformatics (Oxford, England)* **30**, 2906–2914 (2014).

## Supplementary Information

**S1 HMC method details**

**S2 RiVIERA-MT algorithm**

**S3 GWAS simulation**

**S4 Supplementary Fig.**

Figure S1: Simulation pipeline

Figure S2: Model convergence

Figure S3: Power comparison

Figure S4: Estimation of per-SNP variance explained

Figure S5: Visualization of fine-mapping results

Figure S6: Correlation of PIP from single-trait and multi-trait models

## S5 Supplementary Table

Table S1: GWAS summary statistics used in this study

Figure 1

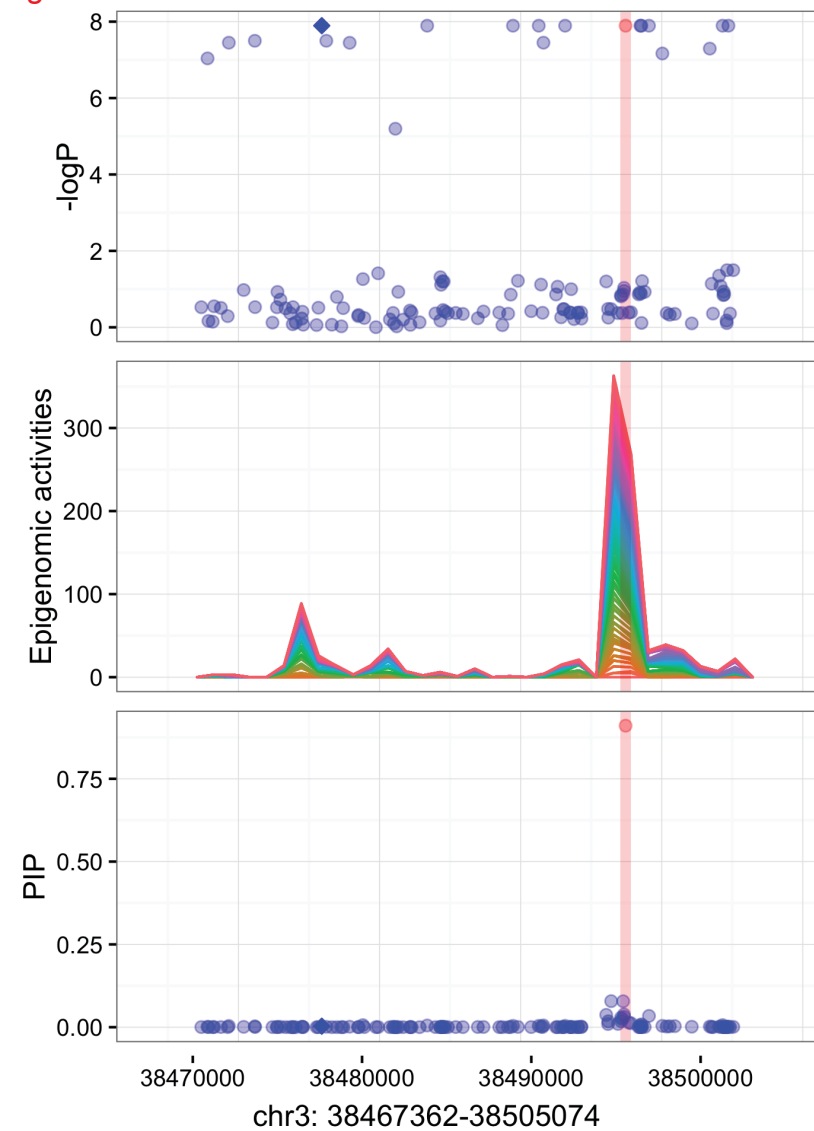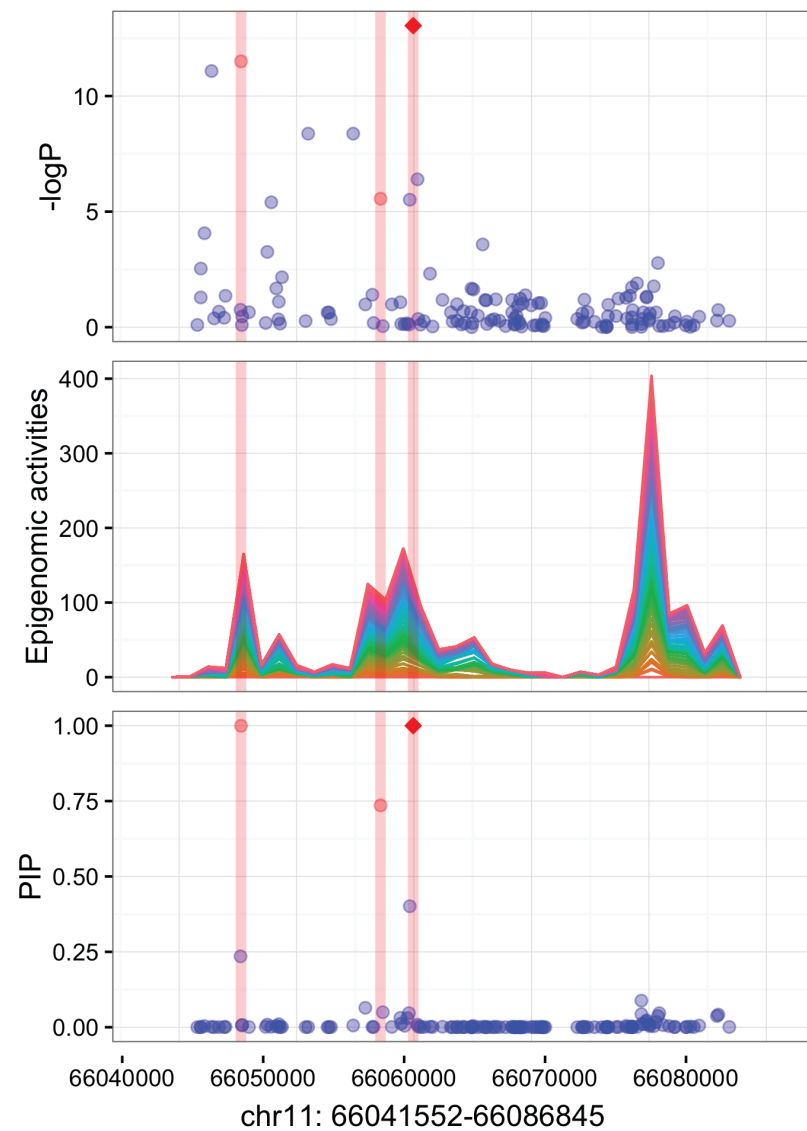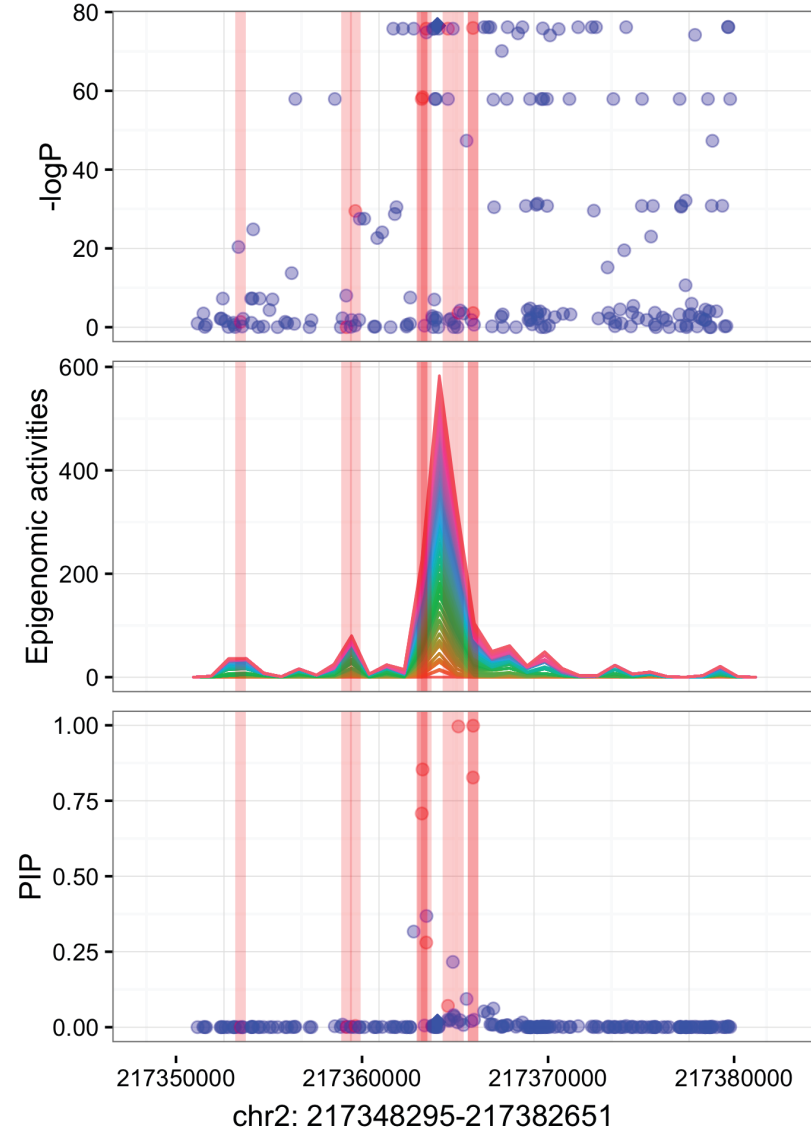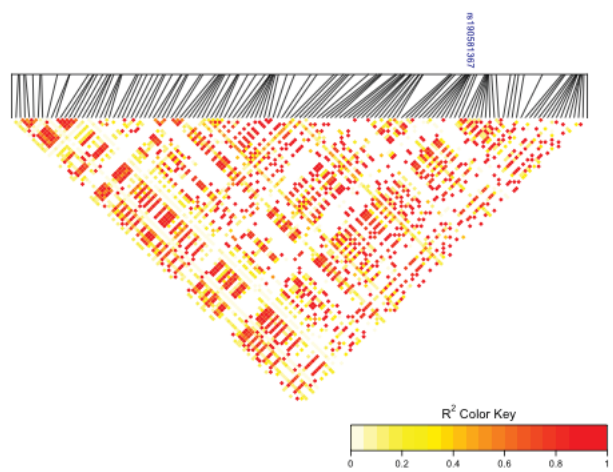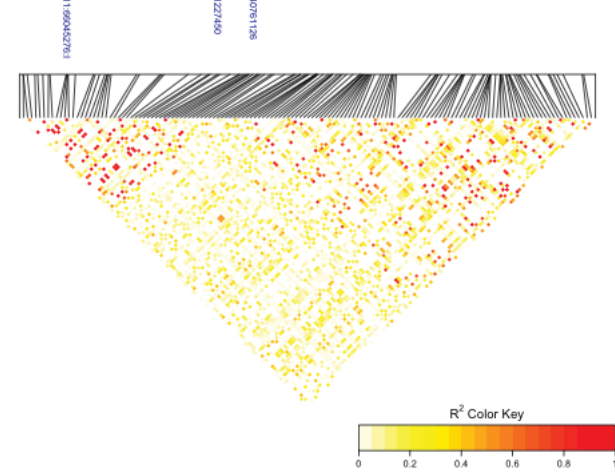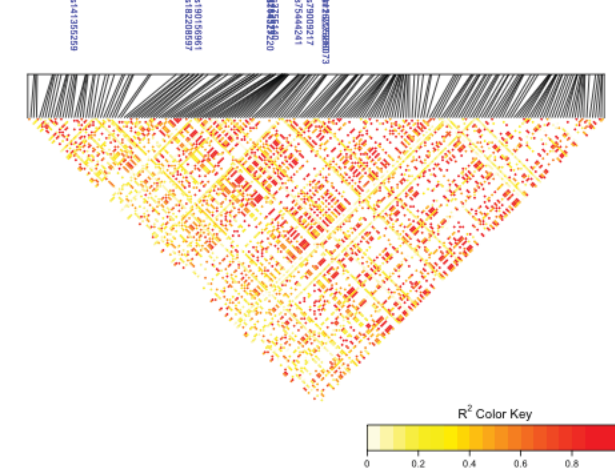



Figure 2

a

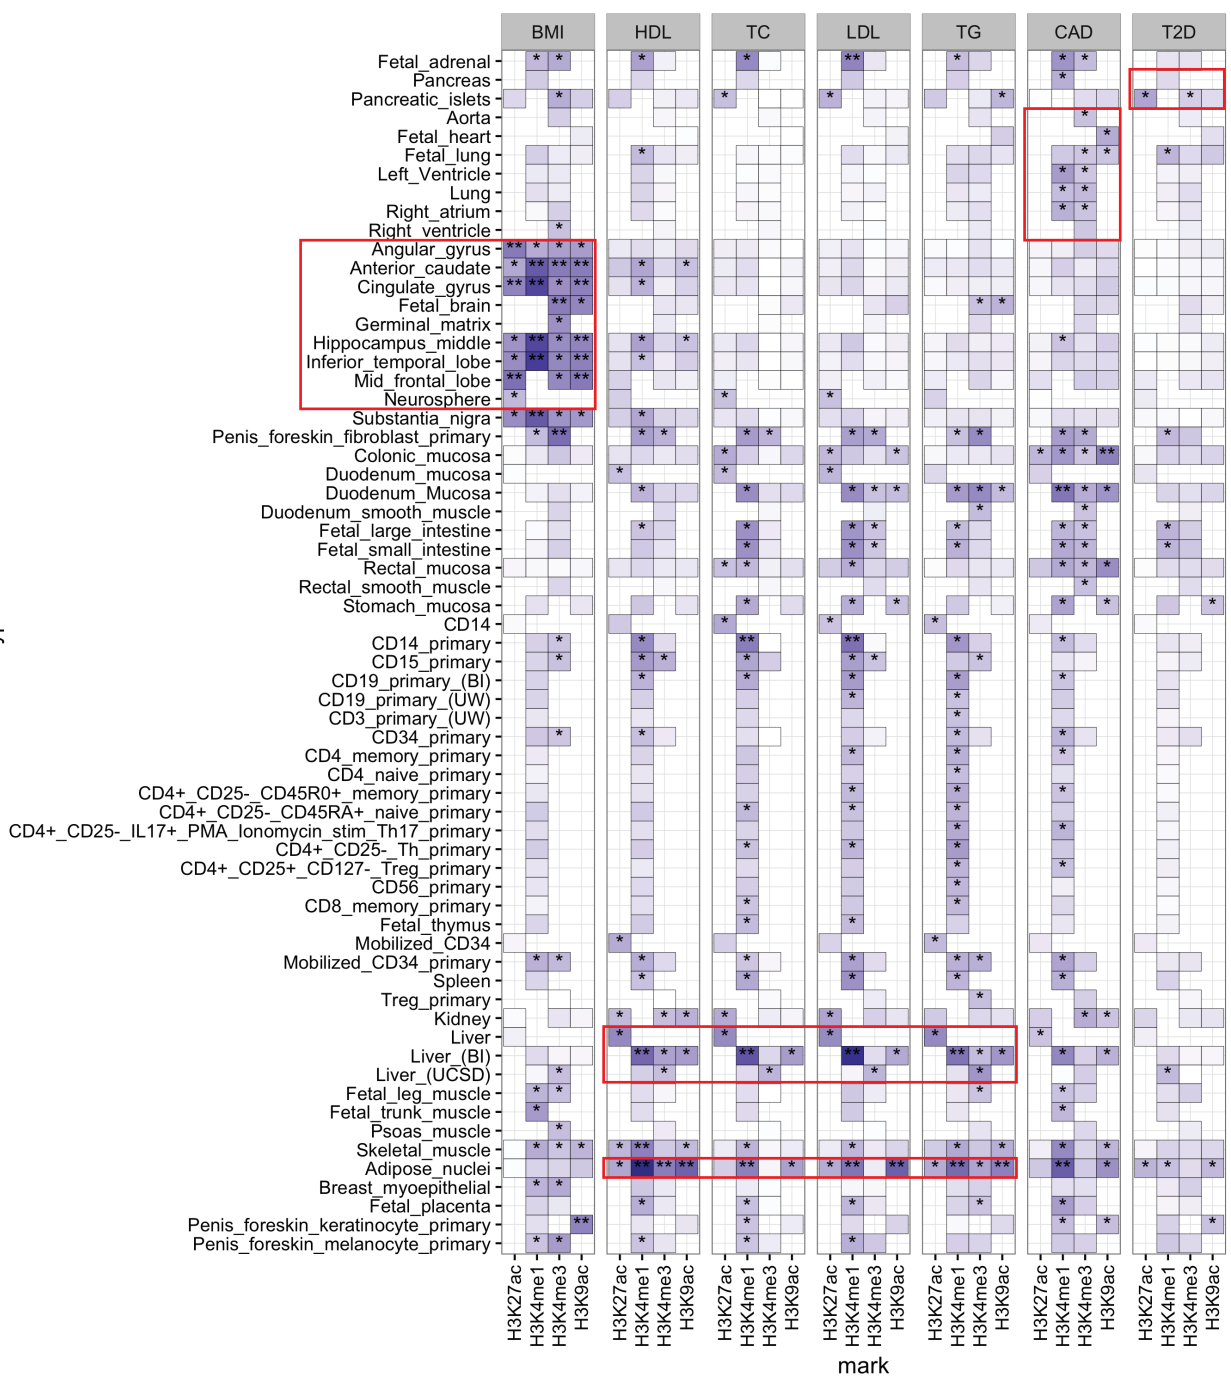

b

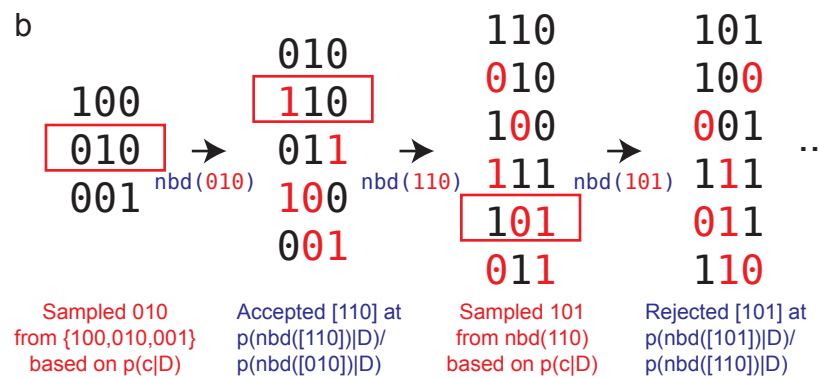

c

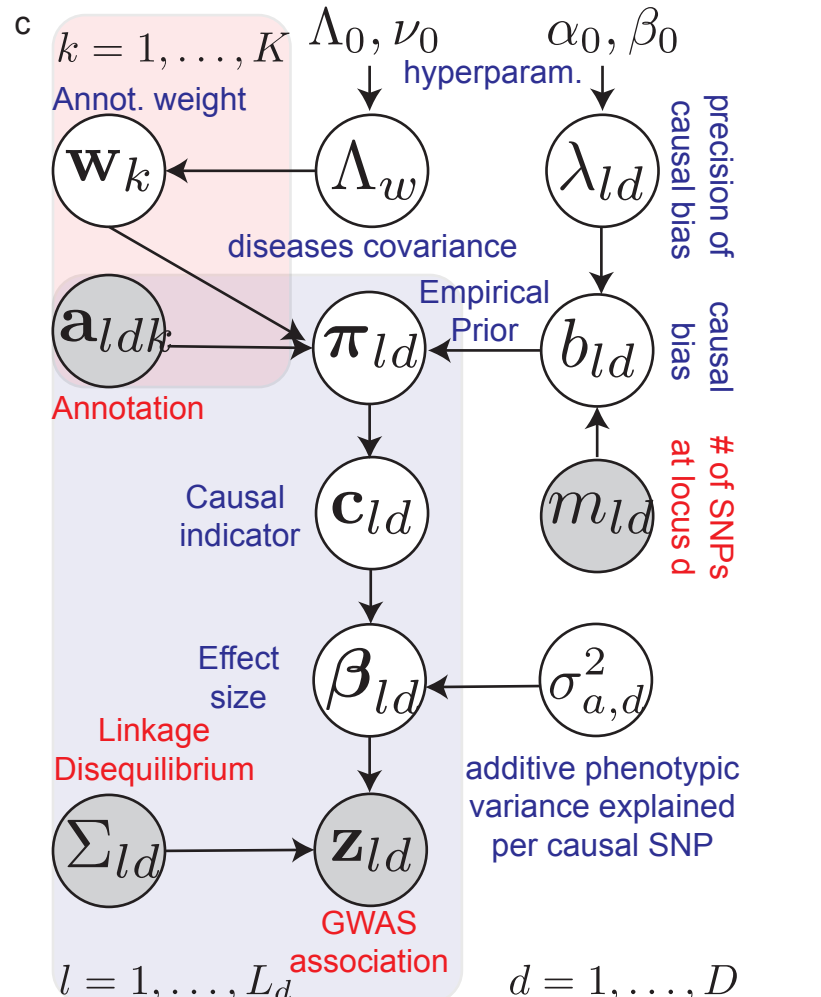

Figure 3

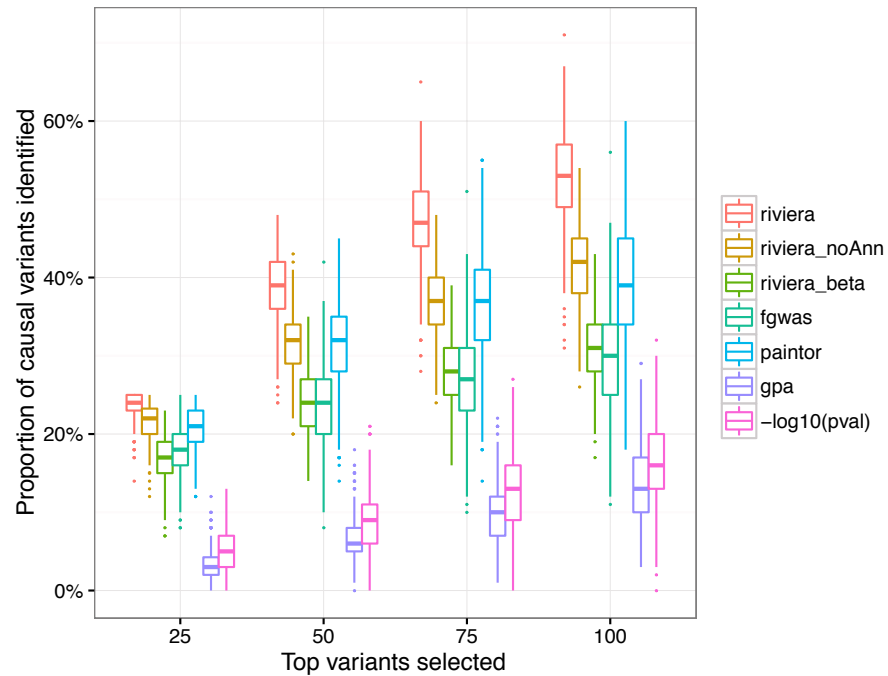

Figure 4

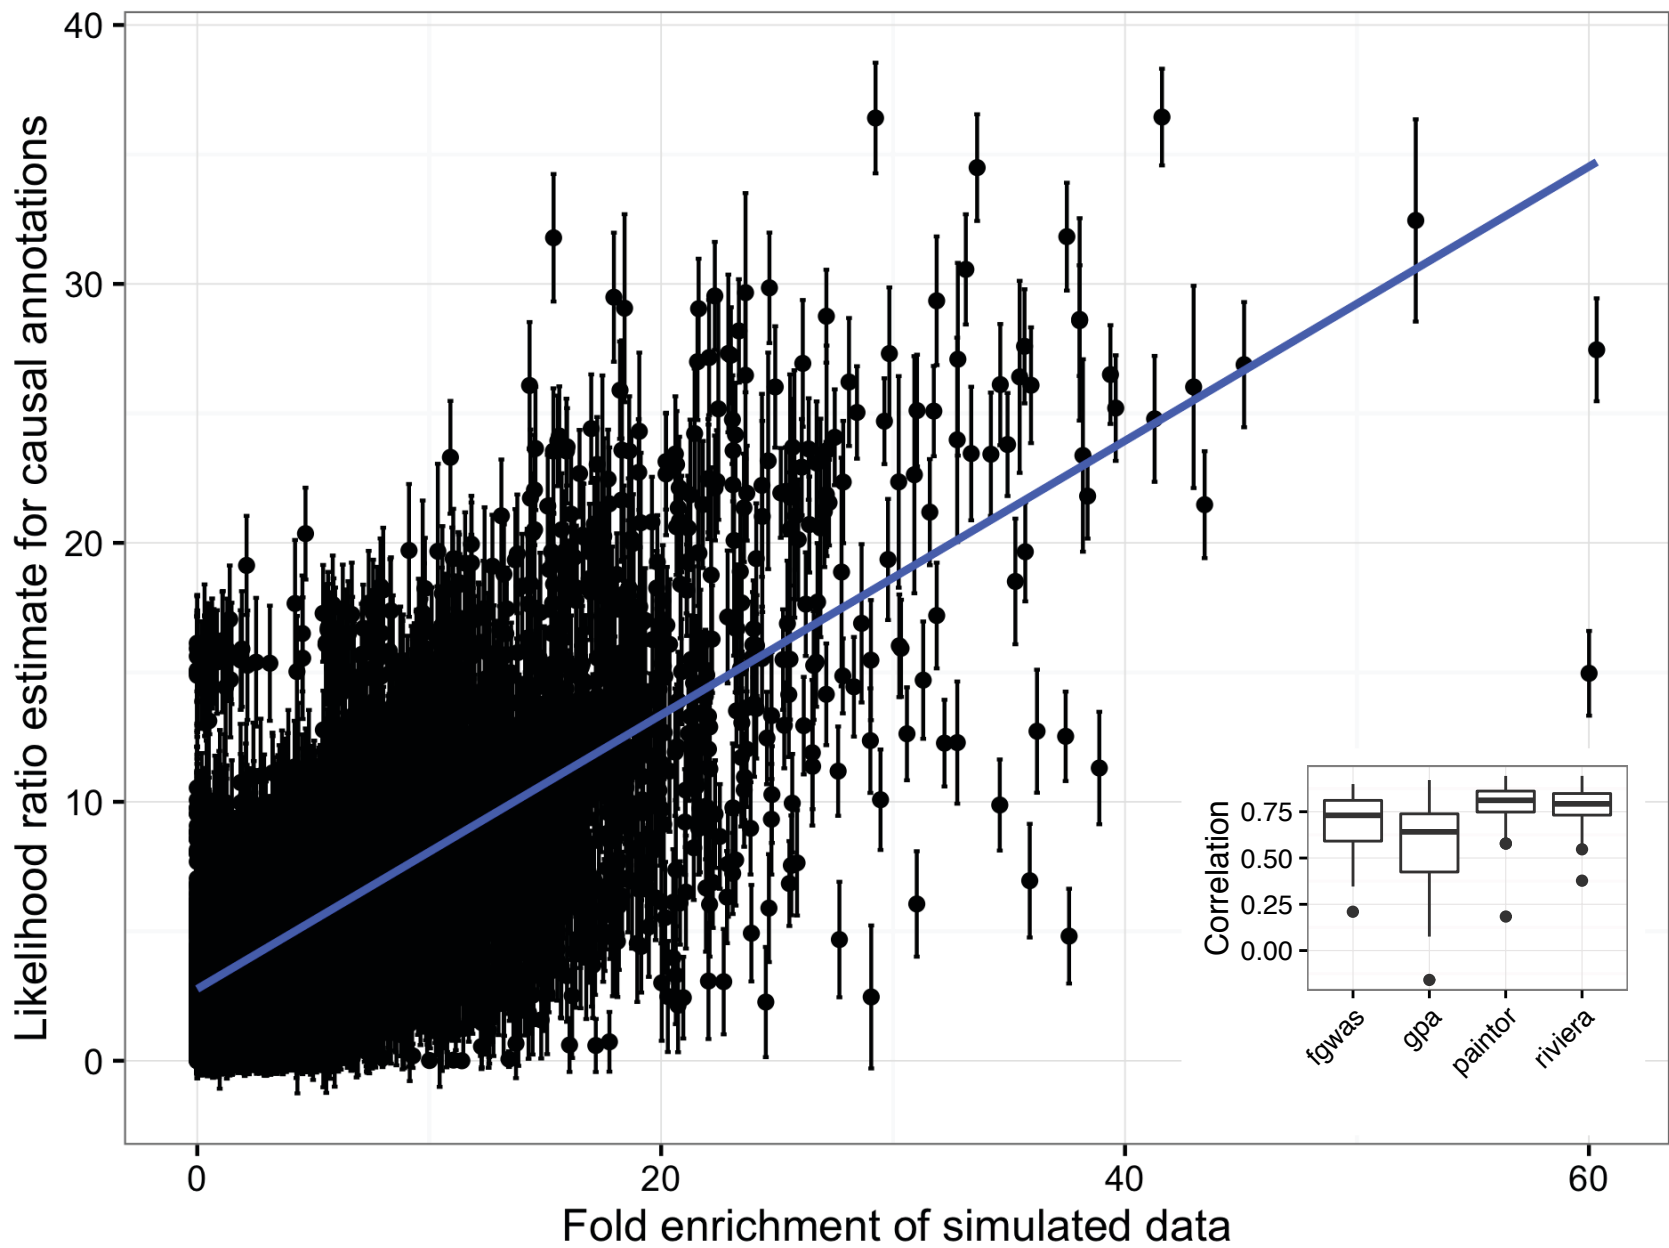

Figure 5

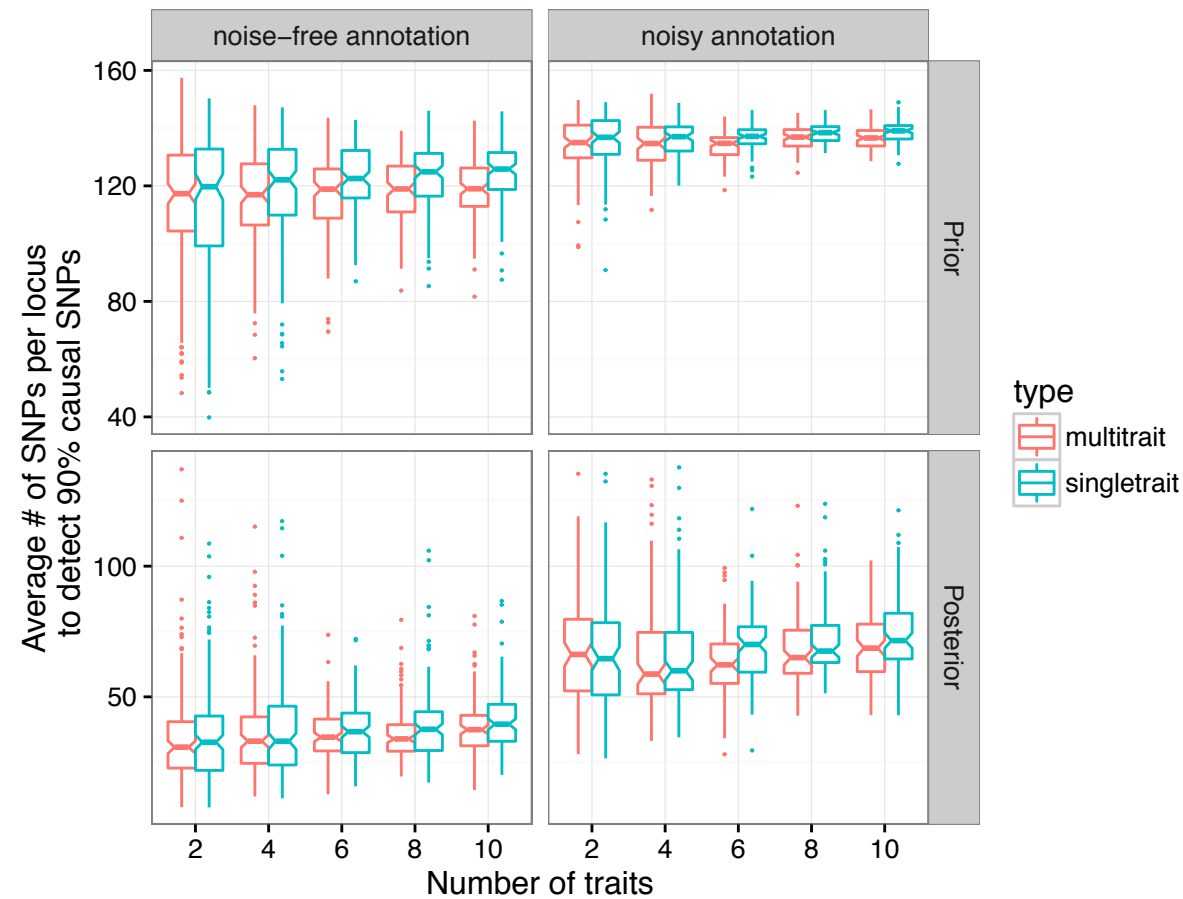

Figure 6

a

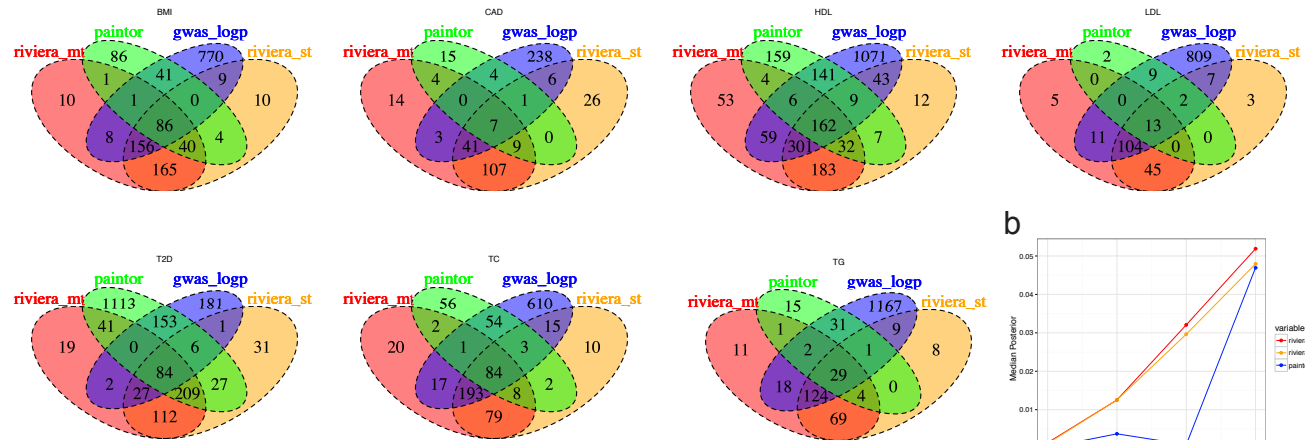

b

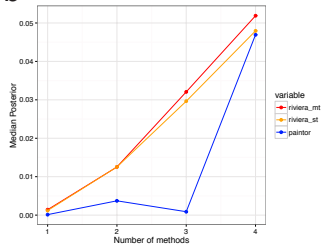

# Figure 7

## a

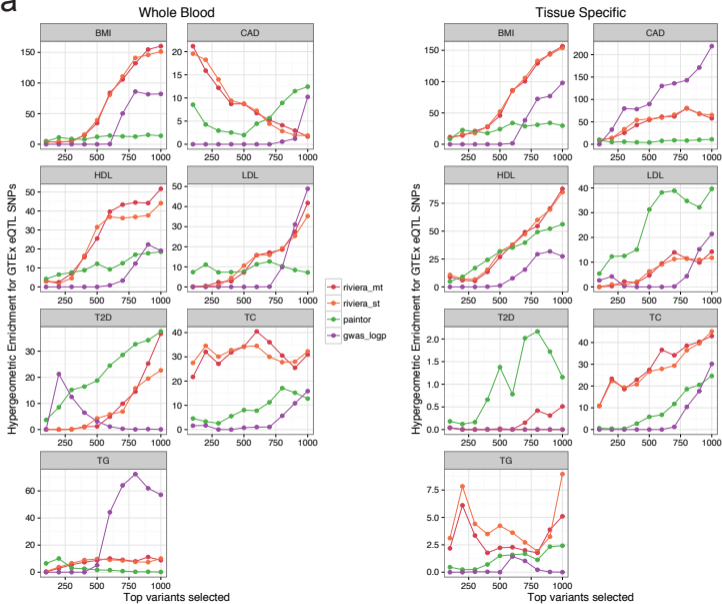

## b

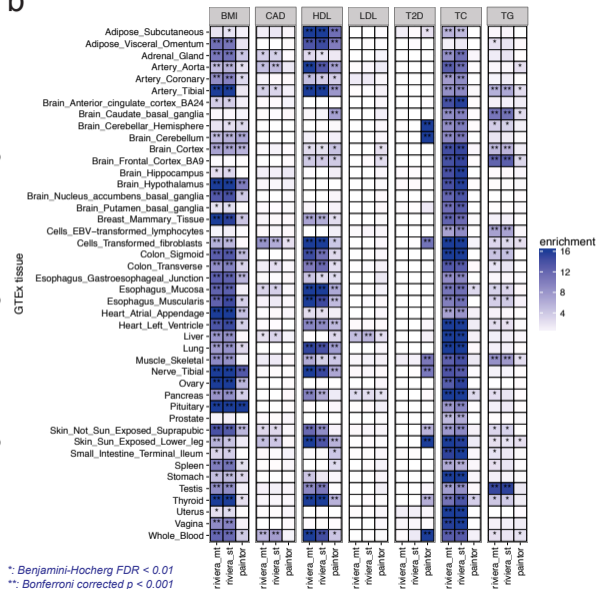

Source: http://www.biorxiv.org/content/10.1101/059345v1.full.pdf
